# Supplementary material for: Erythrocyte adenosine A2B receptor prevents cognitive and auditory dysfunction by promoting hypoxic and metabolic reprogramming
Source: PLoS Biol. 2021 Jun 17;19(6):e3001239. doi: 10.1371/journal.pbio.3001239 (PMC8211187; doi:10.1371/journal.pbio.3001239)
Supplement: S1 Data. Numerical data used in figure preparation — (XLSX) [file pbio.3001239.s006.xlsx]

## Sheet: Fig 1
Fig 1B
	control 2M	control 6M	eAdora2b-/- 2M	eAdora2b-/- 6M
	60.5263	76.1374	71.4994	37.1718
	73.084	68.564	72.8291	52.193
	65.8209	84.7313	62.4193	35.7454
	62.8155	63.6303	60.7227	61.1111
	63.8462	65.1592	50.8498	45.6782
	62.8161	83.8639	63.4189	44.5087
	72.4392	61.326	54.0541	51.1287
AVG	65.9069	71.916	62.2562	46.791
SD	4.94126	9.68244	8.14794	8.8886
SE	1.86762	3.65962	3.07963	3.35957
Fig 1C
	control 2M							AVG	SD	SE
D1	133.6	130.265	65.15	98.965	180	180	107.215	127.885	42.1694	15.9385
D2	105.2	127	104.89	59.0825	154.675	24.6175	42.44	88.2721	47.3927	17.9128
D3	75.3767	42.79	97.7567	51	116.01	36.3867	57.7767	68.1567	29.6455	11.2049
D4	85.9575	42.44	43.6325	46.3675	66.3825	41.325	19.99	49.4421	20.9996	7.9371
D5	33.7	41.91	39.31	36.065	43.935	31.04	22.5325	35.4989	7.28423	2.75318
	control 6M							AVG	SD	SE
D1	180	180	180	180	180	180	169.17	178.453	4.09336	1.54714
D2	180	102.468	126.9	173.743	129.125	130.425	67.775	130.062	38.8457	14.6823
D3	137.768	85.19	61.4925	57.325	90.11	119.885	43.915	85.0979	34.2392	12.9412
D4	163.2	69.26	57.61	120.65	15.5825	40.01	34.025	71.4768	52.5124	19.8478
D5	43.325	33.565	35.3425	46.275	30.3175	34.9425	13.4425	33.8871	10.6191	4.01365
	eAdora2b-/- 2M							AVG	SD	SE
D1	95.65	82.665	100.05	180	180	115.035	101.5	122.129	40.6612	15.3685
D2	70.6425	141.002	108.1	147.192	59.4675	168.05	62.2825	108.105	44.8557	16.9539
D3	73.69	91.4	55.52	71.1433	100.8	180	22.5767	85.0186	48.9919	18.5172
D4	34.5675	59.425	23.9475	50.775	63.65	70.2425	26.6475	47.0364	18.647	7.04791
D5	22.2075	53.86	52.1675	28.35	44.685	39.515	31.2	38.855	12.1305	4.58489
	eAdora2b-/- 6M							AVG	SD	SE
D1	180	180	158.965	180	179.785	128.7	143.835	164.469	21.1884	8.00847
D2	88.825	144.968	132.768	157.15	161.442	65.035	77.2825	118.21	40.165	15.181
D3	66.7425	137.218	86.7275	93.0075	180	85.275	29.9675	96.9911	48.6043	18.3707
D4	68.125	167.975	12.9	131.575	174.3	41.44	63.6825	94.2854	63.5874	24.0338
D5	99.585	166.933	24.0925	97.2175	128.407	57.6425	78.6825	93.2229	46.5186	17.5824
Fig 1D
	control 2M	control 6M	eAdora2b-/- 2M	eAdora2b-/- 6M
	32.6	47.4	14.93	54.73
	55.33	24.23	19.07	180
	26.03	57.1	63.4	61.67
	9.67	74.57	47.2	48
	35.43	24.27	3.23	121.6
	75.7	35.2	32.63	92.93
	55.27	9.9	60.7	71.1
AVG	41.4329	38.9529	34.4514	90.0043
SD	22.0568	22.2102	23.3998	47.0371
SE	8.33669	8.39466	8.84429	17.7783
Fig 1E
	control 2M	control 6M	eAdora2b-/- 2M	eAdora2b-/- 6M
	10.9	11.97	2.17	21.27
	14.87	23.03	7.47	179.77
	21.53	38.77	23.07	27.2
	7.37	10.33	32.47	33.43
	9.07	30.07	12.53	140.43
	5.8	36.83	13.73	29.33
	17.53	20.13	35.5	50.07
AVG	12.4386	24.4471	18.1343	68.7857
SD	5.74404	11.2969	12.5886	64.0242
SE	2.17104	4.26981	4.75803	24.1989
Fig 1F
	control 2M					AVG	SD	SE
8KHz	40	45	40	45	40	42	2.44949	1.09545
16KHz	40	50	40	50	45	45	4.47214	2
24KHz	50	50	45	50	45	48	2.44949	1.09545
32KHz	50	50	50	50	50	50	0	0
	control 6M					AVG	SD	SE
8KHz	45	50	45	55	45	48	4	1.78885
16KHz	45	60	45	55	55	52	6	2.68328
24KHz	70	80	70	85	80	77	6	2.68328
32KHz	90	90	90	90	90	90	0	0
	eAdora2b-/- 2M					AVG	SD	SE
8KHz	50	45	45	45	45	46	2	0.894427
16KHz	50	50	45	45	45	47	2.44949	1.09545
24KHz	65	60	50	50	55	56	5.83095	2.60768
32KHz	60	60	50	55	55	56	3.74166	1.67332
	eAdora2b-/- 6M					AVG	SD	SE
8KHz	45	55	45	45	45	47	4	1.78885
16KHz	45	55	55	45	50	50	4.47214	2
24KHz	60	90	65	65	80	72	11.225	5.01996
32KHz	90	90	90	90	90	90	0	0
Fig 1G
	control 2M					AVG	SD	SE
8KHz	1.1	1.3	0.7	1.1	0.79	0.998	0.220943	0.0988089
16KHz	0.91	1.04	0.47175	1.2	0.65	0.85435	0.262746	0.117504
24KHz	1.79	0.89208	0.75099	1.47	0.95	1.17061	0.393855	0.176137
32KHz	0.64701	0.45451	0.22885	0.75	0.35926	0.487926	0.189094	0.0845653
	control 6M					AVG	SD	SE
8KHz	0.63155	0.14392	0.38746	0.20729	0.6	0.394044	0.198146	0.0886136
16KHz	0.71	0.22009	0.36356	0.19904	0.56	0.410538	0.197598	0.0883686
24KHz	0.822	0.15538	0.45963	0.18717	0.58854	0.442544	0.250309	0.111942
32KHz	0.11065	0.1038	0.18594	0.13975	0.19988	0.148004	0.0388528	0.0173755
	eAdora2b-/- 2M					AVG	SD	SE
8KHz	0.86	0.85129	0.84	0.42	1.01	0.796258	0.198122	0.0886026
16KHz	0.82	0.96	1.06	0.3	0.97	0.822	0.272059	0.121668
24KHz	0.90721	1.15576	1.16	0.36742	0.87014	0.892106	0.28889	0.129195
32KHz	0.41289	0.4404	0.541	0.22262	0.24523	0.372428	0.121075	0.0541463
	eAdora2b-/- 6M					AVG	SD	SE
8KHz	0.7812	0.38746	0.58	0.25987	0.66	0.533706	0.187468	0.0838381
16KHz	0.84136	0.32909	0.48879	0.12091	0.38	0.43203	0.237011	0.105995
24KHz	0.98179	0.45176	0.22155	0.3152	0.65005	0.52407	0.270463	0.120955
32KHz	0.15986	0.17787	0.10715	0.12776	0.22973	0.160474	0.0424571	0.0189874
Fig 1H
	control 2M					AVG	SD	SE
8KHz	1.89	1.97	2.1	1.89	1.97	1.964	0.0768375	0.0343628
16KHz	1.89	1.93	2.1	1.89	1.93	1.948	0.0780769	0.034917
24KHz	1.93	1.93	2.1	1.89	1.93	1.956	0.0736478	0.0329363
32KHz	1.93	1.93	2.1	1.89	1.93	1.956	0.0736478	0.0329363
	control 6M					AVG	SD	SE
8KHz	1.97	2.04	2.1	2.02	1.97	2.02	0.0485798	0.0217256
16KHz	1.93	2.02	2.1	1.97	1.93	1.99	0.0641872	0.0287054
24KHz	1.97	2.02	2.1	1.97	1.93	1.998	0.0584466	0.0261381
32KHz	1.97	2.02	2.1	1.97	1.93	1.998	0.0584466	0.0261381
	eAdora2b-/- 2M					AVG	SD	SE
8KHz	2.02	1.93	1.97	1.77	1.85	1.908	0.0886341	0.0396384
16KHz	2.02	1.93	1.93	1.77	2.02	1.934	0.0913455	0.0408509
24KHz	2.04	1.93	1.93	1.85	1.89	1.928	0.0633719	0.0283408
32KHz	2.02	1.93	1.93	1.85	1.89	1.924	0.0564269	0.0252349
	eAdora2b-/- 6M					AVG	SD	SE
8KHz	2.06	2.18	2.06	2.02	2.06	2.076	0.0542586	0.0242652
16KHz	2.02	2.14	2.06	2.02	2.02	2.052	0.0466476	0.0208614
24KHz	2.02	2.14	2.02	2.02	2.02	2.044	0.048	0.0214663
32KHz	2.02	2.14	2.02	2.02	2.02	2.044	0.048	0.0214663
Fig 1I
	control 2M					AVG	SD	SE
60	0.24338	0.42508	0.117	0.42185	0.25606	0.292674	0.117345	0.0524784
70	0.55216	0.63318	0.22404	0.59219	0.43039	0.486392	0.147669	0.0660394
80	0.63815	1.03	0.36761	0.98	0.57	0.717152	0.251808	0.112612
90	0.82	1.04	0.47175	1.2	0.65	0.83635	0.261397	0.1169
	control 6M					AVG	SD	SE
60	0.22947	0.08011	0.23694	0.0479	0.25147	0.169178	0.0867643	0.0388022
70	0.27826	0.05486	0.15184	0.08855	0.32105	0.178912	0.104269	0.0466306
80	0.44345	0.15426	0.17628	0.18313	0.57482	0.306388	0.170942	0.0764474
90	0.71	0.22009	0.36356	0.19904	0.56	0.410538	0.197598	0.0883686
	eAdora2b-/- 2M					AVG	SD	SE
60	0.24338	0.33364	0.22305	0.19293	0.2598	0.25056	0.0471534	0.0210877
70	0.55216	0.50829	0.44467	0.29808	0.46229	0.453098	0.0860762	0.0384944
80	0.73815	0.66393	0.53277	0.62	0.68763	0.648496	0.0692994	0.0309916
90	0.82	0.96	1.06	0.3	0.97	0.822	0.272059	0.121668
	eAdora2b-/- 2M					AVG	SD	SE
60	0.19822	0.15532	0.18439	0.16203	0.30903	0.201798	0.0557786	0.0249449
70	0.31164	0.1948	0.21955	0.17	0.47834	0.274866	0.112447	0.0502877
80	0.56651	0.26144	0.34002	0.28308	0.61485	0.41318	0.147976	0.0661768
90	0.84136	0.32909	0.48879	0.12091	0.38	0.43203	0.237011	0.105995
Fig 1J
	control 2M					AVG	SD	SE
60	2.06	2.26	2.26	2.06	2.14	2.156	0.0897998	0.0401597
70	2.26	2.14	2.17	1.93	2.18	2.136	0.110381	0.049364
80	2.02	2.06	2.1	2.06	1.97	2.042	0.044	0.0196774
90	1.89	1.93	2.1	1.89	1.93	1.948	0.0780769	0.034917
	control 6M					AVG	SD	SE
60	2.3	2.18	2.18	2.14	2.22	2.204	0.0542586	0.0242652
70	2.22	2.1	2.26	2.14	2.02	2.148	0.0854166	0.0381995
80	1.97	2.06	2.18	2.02	2.06	2.058	0.0693974	0.0310355
90	1.93	2.02	2.1	1.97	1.93	1.99	0.0641872	0.0287054
	eAdora2b-/- 2M					AVG	SD	SE
60	2.26	2.3	2.18	1.97	2.22	2.186	0.115169	0.0515053
70	2.06	2.1	2.18	2.02	2.06	2.084	0.0542586	0.0242652
80	2.1	1.93	2.02	1.93	1.97	1.99	0.0641872	0.0287054
90	2.02	1.93	1.93	1.77	2.02	1.934	0.0913455	0.0408509
	eAdora2b-/- 6M					AVG	SD	SE
60	2.36	2.29	2.24	2.39	2.34	2.324	0.0531413	0.0237655
70	2.14	2.28	2.2	2.18	2.22	2.204	0.0463033	0.0207075
80	2.18	2.18	2.16	2.02	2.1	2.128	0.0614492	0.0274809
90	2.02	2.14	2.06	2.02	2.02	2.052	0.0466476	0.0208614

## Sheet: Fig 2
Fig 2D
	control 2M					AVG	SD	SE
CTX	53.6927	40.2695	40.2695	40.2695	46.9811	44.2965	5.36927	2.40121
HIP	40.2695	29.0835	29.0835	35.7951	24.6092	31.7682	5.55258	2.48319
	control 6M					AVG	SD	SE
CTX	67.1159	60.4043	60.4043	53.6927	60.4043	60.4043	4.24478	1.89832
HIP	60.4043	58.1671	38.0323	38.0323	33.5579	45.6388	11.284	5.04635
	eAdora2b-/- 2M					AVG	SD	SE
CTX	33.5579	40.2695	20.1348	40.2695	46.9811	36.2426	9.10404	4.07145
HIP	44.7439	40.2695	35.7951	38.0323	33.5579	38.4798	3.84902	1.72133
	eAdora2b-/- 6M					AVG	SD	SE
CTX	80.5391	100.674	87.2507	80.5391	73.8275	84.566	9.10403	4.07144
HIP	60.4043	53.6927	58.1671	62.6415	64.8787	59.9569	3.84902	1.72133
Fig 2E
	control 2M					AVG	SD	SE
CTX	26.711	31.7614	29.2531	24.4247	26.6408	27.7582	2.51864	1.12637
HIP	33.4542	29.1294	29.1967	26.4018	27.615	29.1594	2.38485	1.06654
	control 6M					AVG	SD	SE
CTX	32.0519	30.0507	27.5992	27.7674	30.792	29.6523	1.7311	0.77417
HIP	30.3044	28.2162	25.0202	29.606	33.7187	29.3731	2.83168	1.26637
	eAdora2b-/- 2M					AVG	SD	SE
CTX	24.6348	32.0551	33.0972	32.5999	24.4009	29.3576	3.96602	1.77366
HIP	30.3705	29.9652	32.2915	25.1785	25.1006	28.5813	2.91808	1.305
	eAdora2b-/- 6M					AVG	SD	SE
CTX	48.4594	46.1698	49.0632	51.1411	48.5038	48.6674	1.58644	0.709478
HIP	52.5951	49.4458	48.4498	53.1325	54.3452	51.5937	2.25561	1.00874
Fig 2F
	control 2M	control 6M	eAdora2b-/- 2M	eAdora2b-/- 6M
	5.79693	23.9735	15.0532	44.3574
	5.49546	29.1435	12.0481	42.7014
	7.23758	28.8663	13.1313	46.4701
	8.04384	22.8462	8.77595	41.3042
	12.1303	19.7238	7.25488	44.6088
AVG	7.74081	24.9106	11.2527	43.8884
SD	2.66612	4.04993	3.1907	1.96792
SE	1.19232	1.81118	1.42693	0.880081
Fig 2G
	control 2M CTX					AVG	SD	SE			control 2M HIP					AVG	SD	SE
IL-Iβ	0.985816	1.00012	0.971049	1.04302		1	0.0310376	0.0155188		IL-Iβ	0.98468	0.976026	1.09344	0.945854		1	0.0644776	0.0322388
IL-6	0.887669	1.04897	1.0283	1.03506		1	0.0753805	0.0376902		IL-6	0.960297	1.01359	1.03248	0.993631		1	0.0308585	0.0154292
TNF-α	0.893566	0.969033	1.08165	1.05575		1	0.0857556	0.0428778		TNF-α	0.972897	1.05231	0.979298	0.9955		1	0.0361442	0.0180721
iNOS	0.99566	0.97794	0.962256	1.06414		1	0.044887	0.0224435		iNOS	1.02743	0.938982	1.0912	0.942392		1	0.073284	0.036642
	control 6M CTX					AVG	SD	SE			control 6M HIP					AVG	SD	SE
IL-Iβ	4.20979	8.88938	3.70314	3.41547	6.97447	5.43845	2.39174	1.06962		IL-Iβ	3.13471	1.84676	3.65955	4.2624	1.38671	2.85803	1.2123	0.542157
IL-6	2.45732	3.54	1.24869	4.47044	3.29532	3.00235	1.21476	0.543257		IL-6	3.87268	4.357	3.13109	1.18372	4.55252	3.4194	1.36472	0.610323
TNF-α	2.77422	3.99654	1.40973	5.04697	1.86015	3.01752	1.50506	0.673084		TNF-α	2.20636	3.71922	2.76702	2.38667	2.95878	2.80761	0.590386	0.264029
iNOS	1.03556	0.96845	0.68797	0.818138	2.88869	1.27976	0.909467	0.406726		iNOS	2.5862	1.67501	1.53776	3.89737	3.5739	2.65405	1.07252	0.479645
	eAdora2b-/- 2M CTX					AVG	SD	SE			eAdora2b-/- 2M HIP					AVG	SD	SE
IL-Iβ	1.19921	0.616462	1.41953	0.622185	0.930074	0.957493	0.354046	0.158334		IL-Iβ	0.58574	0.724471	1.08548	0.976032	0.410371	0.756419	0.276773	0.123776
IL-6	0.587944	0.418631	0.110881	1.36644	0.933303	0.683439	0.483731	0.216331		IL-6	1.42734	0.638754	0.538369	6.17597	1.00696	1.95748	2.38396	1.06614
TNF-α	0.796686	1.27346	1.23292	1.00608	0.512426	0.964315	0.316926	0.141733		TNF-α	1.30888	0.908568	0.484645	0.741405	1.00812	0.890324	0.306655	0.13714
iNOS	1.04277	1.39515	1.24007	0.735646	1.19506	1.12174	0.249717	0.111677		iNOS	1.01455	1.26649	1.8119	1.7221	1.18715	1.40043	0.348249	0.155742
	eAdora2b-/- 6M CTX					AVG	SD	SE			eAdora2b-/- 6M HIP					AVG	SD	SE
IL-Iβ	8.93056	9.77265	10.6695	4.41399	5.48471	7.85428	2.74837	1.22911		IL-Iβ	4.5263	2.66044	6.78179	8.21541	5.24763	5.48632	2.12664	0.951062
IL-6	8.03937	6.33678	2.62154	9.45067	4.17107	6.12389	2.77767	1.24221		IL-6	9.29636	7.21	8.30128	8.05564	8.81524	8.33571	0.790513	0.353528
TNF-α	6.86257	6.01577	8.6463	7.05551	4.84137	6.68431	1.40199	0.62699		TNF-α	7.84442	4.65355	7.13543	3.18582	9.24282	6.41241	2.45403	1.09748
iNOS	1.16507	4.27843	3.48321	1.27493	6.30757	3.30184	2.1619	0.966829		iNOS	1.69056	2.33621	4.22075	3.70849	2.97763	2.98673	1.01822	0.455361
Fig 2H
	control 2M CTX			AVG	SD	SE					control 2M HIP			AVG	SD	SE
HK	1.00101	0.995968	1.00302	1	0.0036344	0.00209832				HK	1.0072	0.992308	1.0005	1	0.00745638	0.00430494
PK	1.11194	0.91791	0.970149	1	0.1004	0.0579661				PK	1.00352	0.998239	0.998239	1	0.00304956	0.00176067
LDH1	1.04413	1.01429	0.941579	1	0.0527473	0.0304537				LDH1	0.992453	1.00755	1	1	0.007547	0.00435726
	control 6M CTX			AVG	SD	SE					control 6M HIP			AVG	SD	SE
HK	1.16473	1.14076	1.07177	1.12576	0.0482633	0.0278648				HK	1.40769	1.12766	1.15936	1.23157	0.153347	0.0885348
PK	1.04247	1.14076	1.04972	1.07765	0.0547793	0.0316268				PK	0.966537	1.04284	1.18428	1.06455	0.110485	0.0637887
LDH1	0.961483	1.06683	0.988514	1.00561	0.0547156	0.0315901				LDH1	0.742262	1.18921	1.25701	1.06283	0.27968	0.161473
	eAdora2b-/- 2M CTX			AVG	SD	SE					eAdora2b-/- 2M HIP			AVG	SD	SE
HK	0.947425	1.02699	0.959264	0.977892	0.042927	0.0247839				HK	1.05946	1.11987	1.04488	1.07474	0.0397623	0.0229568
PK	1.04247	0.946058	1	0.996175	0.0483177	0.0278962				PK	0.974905	0.948246	0.915945	0.946365	0.029525	0.0170462
LDH1	0.954842	1.03766	0.878633	0.957045	0.0795364	0.0459204				LDH1	1.10957	0.907519	1.02811	1.01507	0.101655	0.0586905
	eAdora2b-/- 6M CTX			AVG	SD	SE					eAdora2b-/- 6M HIP			AVG	SD	SE
HK	0.496546	0.63728	0.503478	0.545768	0.0793275	0.0457997				HK	1.08925	1.11214	1.16743	1.12294	0.0401932	0.0232056
PK	0.888843	0.882703	0.882703	0.88475	0.00354493	0.00204667				PK	0.848704	0.638754	0.754364	0.747274	0.105154	0.0607109
LDH1	0.786399	0.814131	0.831238	0.810589	0.0226283	0.0130645				LDH1	1.05701	0.880993	0.974561	0.970856	0.0880685	0.0508464

## Sheet: Fig 3
Fig 3C
	control 2M	control 6M	eAdora2b-/- 2M	eAdora2b-/- 6M
	21.1236	233.233	40.4028	493.243
	33.0433	217.308	58.6016	547.111
	52.8364	226.279	34.4263	299.301
AVG	35.6678	225.607	44.4769	446.551
SD	16.0185	7.9835	12.5921	130.336
SE	9.24827	4.60928	7.27002	75.2496
Fig 3D
	control 2M					AVG	SD	SE
IL-Iβ	0.952329	0.984329	1.05578	1.00756		1	0.0435385	0.0217693
IL-6	1.05461	1.01866	0.94198	0.984755		1	0.0480586	0.0240293
TNF-α	0.909551	1.04322	0.992506	1.05472		1	0.06608	0.03304
iNOS	0.952113	1.02402	1.02986	0.994008		1	0.0355791	0.0177896
	control 6M					AVG	SD	SE
IL-Iβ	5.15153	4.98756	1.79212	4.19402	1.80876	3.5868	1.67044	0.747045
IL-6	6.6499	2.81539	3.89962	3.49833	1.93634	3.75992	1.77887	0.795535
TNF-α	4.58551	3.08175	3.28771	4.04765	3.52368	3.70526	0.609951	0.272778
iNOS	1.11664	2.33351	1.90418	1.71218	2.58919	1.93114	0.571621	0.255637
	eAdora2b-/- 2M					AVG	SD	SE
IL-Iβ	0.857574	1.41585	1.36762	0.917004	1.23828	1.15926	0.257486	0.115151
IL-6	0.858565	1.27751	0.643197	0.544624	0.770215	0.818822	0.283004	0.126563
TNF-α	1.59153	0.594775	0.297388	0.316896	0.543524	0.668823	0.532539	0.238159
iNOS	0.613797	1.18852	0.359111	0.51614	0.753929	0.686299	0.315461	0.141078
	eAdora2b-/- 6M					AVG	SD	SE
IL-Iβ	9.39353	12.2242	7.64756	12.5099		10.4438	2.33528	1.16764
IL-6	11.2876	4.22807	8.59402	7.26015		7.84246	2.93466	1.46733
TNF-α	8.2083	5.96732	11.1354	10.1759		8.87173	2.28771	1.14385
iNOS	2.34974	7.22251	2.63749	2.75585		3.7414	2.327	1.1635

## Sheet: Fig 4
Fig 4B
	before hypoxia			after hypoxia
	control 2M	eAdora2b-/- 2M		control 2M	eAdora2b-/- 2M
	72.963	70.4545		51.6129	57.0675
	73.8418	80.8502		73.773	34.3119
	81.033	64.083		71.9737	48.8633
	61.5901	67.4632		52.9837	46.2936
	53.7221	83.2025		53.7024	43.2022
	81.1594	88.328		47.3398	47.8881
	62.8161	82.3851		55.0057	48.4967
AVG	69.5894	76.6809		58.0559	46.589
SD	10.4556	9.2245		10.4168	6.86274
SE	3.95186	3.48653		3.9372	2.59387
Fig 4D
	control 2M							AVG	SD	SE
D1	180	46.5	49.035	124.665	180	180	102.615	123.259	59.8441	22.619
D2	125.01	97.1	93.1825	69.7425	133.157	179.975	79.4675	111.091	37.9734	14.3526
D3	117.79	88.0533	49.6	70.3667	74.3575	147.107	67.0075	87.7546	33.6477	12.7176
D4	72.19	44.2825	85.6525	111.545	34.825	101.475	55.99	72.28	28.9397	10.9382
D5	47.425	34.4575	26.05	69.035	25.775	63.925	45.9025	44.6529	17.2314	6.51287
	eAdora2b-/- 2M							AVG	SD	SE
D1	112.665	47.08	112.035	180	58.365	119.15	180	115.614	52.1208	19.6998
D2	86.925	143.96	47.2675	73.16	51.04	135.558	133.857	95.9668	41.4295	15.6589
D3	86.3825	63.2133	50.9667	132.61	46.6567	123.075	71.285	82.027	34.0287	12.8616
D4	26.6475	64.7825	27.25	76.1525	139.433	50.775	63.65	64.0986	38.2079	14.4412
D5	73.2575	25.115	18.8525	28.9425	108.157	28.35	44.685	46.7657	32.6083	12.3248
Fig 4E
	control 2M	eAdora2b-/- 2M
	27.57	71.8
	19.93	54.27
	28.67	66.77
	38.1	37.87
	25.47	56.93
	12	61.93
	31.03	46.7
AVG	26.11	56.61
SD	8.31009	11.6707
SE	3.14092	4.41113
Fig 4F
	control 2M					AVG	SD	SE
8KHz	55	45	65	50	55	54	7.4162	3.31662
16KHz	55	45	65	50	55	54	7.4162	3.31662
24KHz	75	55	75	55	60	64	10.247	4.58258
32KHz	75	65	85	60	75	72	9.74679	4.3589
	eAdora2b-/- 2M					AVG	SD	SE
8KHz	55	50	60	50	50	53	4.47214	2
16KHz	55	55	60	55	55	56	2.23607	1
24KHz	75	70	60	60	75	68	7.58288	3.39116
32KHz	90	70	85	60	85	78	12.5499	5.61249
Fig 4G
	control 2M					AVG	SD	SE
8KHz	0.543111	0.49	0.55933	0.74	0.38	0.542488	0.130817	0.0585032
16KHz	0.48328	0.51	0.7586	0.62422	0.41	0.55722	0.136394	0.0609973
24KHz	0.72104	0.37741	0.33003	0.59027	0.29828	0.463406	0.183658	0.0821343
32KHz	0.017435	0.19653	0.13869	0.251	0.17855	0.156441	0.0875716	0.0391632
	eAdora2b-/- 2M					AVG	SD	SE
8KHz	0.31	0.44	0.62	0.92	0.69	0.596	0.234798	0.105005
16KHz	0.2949	0.4	0.95241	0.7	0.32033	0.533528	0.284342	0.127162
24KHz	0.1043	0.86	0.25514	0.52762	0.36601	0.422614	0.289356	0.129404
32KHz	0.12025	0.20402	0.35491	0.64082	0.1694	0.29788	0.21079	0.0942681
Fig 4H
	control 2M					AVG	SD	SE
8KHz	2.18	1.93	2.06	1.93	2.06	2.032	0.105214	0.0470532
16KHz	2.22	1.93	2.06	1.89	1.93	2.006	0.135757	0.0607124
24KHz	2.18	1.97	2.06	1.89	2.02	2.024	0.107842	0.0482286
32KHz	2.18	1.93	2.06	1.89	2.06	2.024	0.115888	0.0518266
	eAdora2b-/- 2M					AVG	SD	SE
8KHz	2.14	2.1	2.3	2.02	2.1	2.132	0.103537	0.0463033
16KHz	2.1	2.14	2.3	1.97	2.06	2.114	0.121573	0.0543691
24KHz	2.18	2.14	2.3	1.93	2.06	2.122	0.137913	0.0616766
32KHz	2.18	2.14	2.3	1.93	2.06	2.122	0.137913	0.0616766
Fig 4I
	control 2M					AVG	SD	SE
60	0.25607	0.17265		0.13872	0.14277	0.177553	0.054488	0.027244
70	0.1525	0.34407	0.36541	0.19512	0.15734	0.242888	0.103706	0.0463787
80	0.33634	0.41612	0.52917	0.5	0.30077	0.41648	0.0993554	0.0444331
90	0.48328	0.51	0.7586	0.62422	0.41	0.55722	0.136394	0.0609973
	eAdora2b-/- 2M					AVG	SD	SE
60	0.11959	0.13457	0.2494	0.26044	0.0633	0.16546	0.0859681	0.0384461
70	0.15022	0.30804	0.17115	0.41	0.09372	0.226626	0.129261	0.0578073
80	0.28584	0.31163	0.34321	0.44156	0.27093	0.330634	0.067814	0.0303273
90	0.2949	0.4	0.92541	0.7	0.32033	0.528128	0.274484	0.122753
Fig 4J
	control 2M					AVG	SD	SE
60	2.55	2.02		2.14	2.26	2.2425	0.227211	0.113606
70	2.34	2.05	2.43	2.1	2.22	2.228	0.15928	0.071232
80	2.3	1.93	2.26	1.93	2.02	2.088	0.179639	0.0803368
90	2.22	1.93	2.06	1.89	1.93	2.006	0.135757	0.0607124
	eAdora2b-/- 2M					AVG	SD	SE
60	2.47	2.47	2.88	2.14	2.63	2.518	0.269759	0.12064
70	2.3	2.34	2.59	2.06	2.39	2.336	0.190342	0.0851234
80	2.22	2.26	2.55	1.93	2.22	2.236	0.219841	0.0983158
90	2.1	2.14	2.3	1.97	2.06	2.114	0.121573	0.0543691

## Sheet: Fig 5
Fig 5E
	control 2M					AVG	SD	SE
CTX	53.6927	40.2695	40.2695	67.1159	70.5391	54.3774	14.3353	6.41093
HIP	60.4043	58.1671	38.0323	35.7951	58.1671	50.1132	12.1098	5.41568
	eAdora2b-/- 2M					AVG	SD	SE
CTX	93.9622	56.9811	87.2507	73.8275	67.1159	75.8275	14.9536	6.68743
HIP	64.8787	69.3531	78.3019	62.6415	60.4043	67.1159	7.07464	3.16387
Fig 5F
	control 2M					AVG	SD	SE
CTX	41.5725	42.7521	44.4224	39.3896	48.3481	43.2969	3.366	1.50532
HIP	48.3732	42.0964	47.8249	42.5364	43.0263	44.7714	3.06158	1.36918
	eAdora2b-/- 2M					AVG	SD	SE
CTX	42.4903	47.7958	51.2394	47.6684	41.7681	46.1924	3.98439	1.78187
HIP	40.8759	52.6889	54.7485	52.7652	46.6167	49.5391	5.72402	2.55986
Fig 5G
	control 2M	eAdora2b-/- 2M
	17.5572	24.8542
	18.541	31.5743
	22.97	23.2417
	35.5904	52.4186
	8.86834	17.6925
AVG	20.7054	29.9563
SD	9.76479	13.4971
SE	4.36695	6.0361
Fig 5H
	control 2M	eAdora2b-/- 2M
	215.961	387.24
	166.059	358.332
	156.904	376.948
AVG	179.641	374.174
SD	31.7851	14.6522
SE	18.3511	8.45947
Fig 5I
	control 2M CTX					AVG	SD	SE			control 2M HIP					AVG	SD	SE
IL-Iβ	1.03666	1.11369	0.936764	0.929364	0.983518	1	0.0766966	0.0342998		IL-Iβ	1.00569	1.05823	0.949017	0.999224	0.987836	1	0.0392778	0.0175656
IL-6	1.00714	1.13628	0.847278	1.02749	0.981813	1	0.103722	0.046386		IL-6	1.00569	1.05823	0.949017	0.999224	0.987836	1	0.0392778	0.0175656
TNF-α	0.961134	0.975073	1.00416	1.00012	1.05951	1	0.0377183	0.0168682		TNF-α	1.01602	1.01934	0.987455	1.03548	0.941705	1	0.0368959	0.0165004
iNOS	1.00161	1.00724	1.01082	0.91759	1.06274	1	0.0522012	0.0233451		iNOS	0.997694	1.0882	0.954619	0.96071	0.998782	1	0.0533584	0.0238626
	eAdora2b-/- 2M CTX					AVG	SD	SE			eAdora2b-/- 2M HIP					AVG	SD	SE
IL-Iβ	2.47941	0.928731	0.788218	2.7007	1.1355	1.60651	0.909677	0.40682		IL-Iβ	1.92297	3.78423	2.36745	1.14605	3.00355	2.44485	1.00888	0.451183
IL-6	2.04486	4.39339	3.48703	1.17718	2.36526	2.69354	1.25966	0.563339		IL-6	2.09459	1.89211	2.36745	2.2921	1.50177	2.0296	0.348128	0.155688
TNF-α	2.22633	2.25741	2.26263	3.51778	2.55148	2.56313	0.549705	0.245835		TNF-α	1.26167	1.44928	2.78048	1.99354	1.0037	1.69773	0.705939	0.315706
iNOS	0.769681	0.590087	0.828745	0.760841	0.63244	0.716359	0.100548	0.0449664		iNOS	0.333402	1.02479	0.817147	1.71555	0.551717	0.888521	0.531326	0.237616
Fig 5J
	control 2M					AVG	SD	SE
IL-Iβ	0.966931	1.00254	1.11171	0.96082	0.957999	1	0.0649591	0.0290506
IL-6	0.950145	1.00732	0.953376	1.06515	1.02401	1	0.0488195	0.0218327
TNF-α	0.955011	1.00447	0.935033	0.997121	1.10837	1	0.0671133	0.030014
iNOS	0.986298	1.0368	0.96441	0.990857	1.02164	1	0.0289838	0.0129619
	eAdora2b-/- 2M					AVG	SD	SE
IL-Iβ	1.73989	2.27995	0.842258	3.06453	1.73989	1.93331	0.816247	0.365037
IL-6	2.30537	1.45565	0.978289	3.94038	2.16095	2.16813	1.12729	0.504137
TNF-α	2.46627	1.77645	1.39056	0.913198	0.983275	1.50595	0.638994	0.285767
iNOS	0.529854	0.754539	0.58927	0.713837	0.772175	0.671935	0.106827	0.0477743

## Sheet: Fig 6
Fig 6F
	control 2M					AVG	SD	SE
normoxia	3651225	3771016	4603364	3475536	2728354	3645899	671441	300278
hypoxia	2049456	1788282	1066812	1589994	1796170	1.65814e+06	368589	164838
	eAdora2b-/- 2M					AVG	SD	SE
normoxia	3094500	3376277	1888042	2963933	3298245	2.9242e+06	601766	269118
hypoxia	2235689	1752001	2692563	2724722	2646488	2.41029e+06	417781	186837
Fig 6G
	control 2M					AVG	SD	SE
normoxia	30.1269	71.0684	57.5666	63.0119	89.0647	62.1677	21.5126	9.62073
hypoxia	3.44054	362.359	1227.96	244.026	62.3549	380.028	495.108	221.419
	eAdora2b-/- 2M					AVG	SD	SE
normoxia	66.2466	57.7559	121.29	46.5598	75.1915	73.4087	28.7791	12.8704
hypoxia	66.6461	170.662	79.4782	62.3917	69.904	89.8164	45.63	20.4063
Fig 6H
	control					AVG	SD	SE
2M normoxia	0.532659	0.372674	0.458111	0.437605	0.403759	0.440962	0.0607472	0.027167
6M	0.625075	0.592871	0.499707	0.479056	0.625114	0.564365	0.0700839	0.0313425
2M hypoxia	0.741249	0.920812	0.699387	0.76682	0.663004	0.758254	0.0991533	0.0443427
	eAdora2b-/- 2M					AVG	SD	SE
2M normoxia	0.304785	0.440238	0.491463	0.518347	0.354245	0.421816	0.0905132	0.0404787
6M	0.542164	0.556404	0.351485	0.612592	0.617169	0.535963	0.108345	0.0484535
2M hypoxia	0.441177	0.490914	0.551784	0.65497	0.694101	0.566589	0.10694	0.047825
Fig 6I
	control					AVG	SD	SE
2M normoxia	0.200158	0.216178	0.170431	0.181153	0.222238	0.198032	0.0221723	0.00991575
6M	0.228197	0.160566	0.183302	0.18802	0.207472	0.193511	0.0255821	0.0114407
2M hypoxia	0.40021	0.374994	0.315412	0.331073	0.337418	0.351821	0.0347923	0.0155596
	eAdora2b-/- 2M					AVG	SD	SE
2M normoxia	0.233098	0.19152	0.232927	0.180261	0.191236	0.205808	0.0252454	0.0112901
6M	0.159626	0.142002	0.158972	0.156389	0.168519	0.157102	0.00960122	0.0042938
2M hypoxia	0.218225	0.200931	0.227995	0.174928	0.184355	0.201287	0.0222589	0.00995447
Fig 6J
	control					AVG	SD	SE
2M normoxia	4.38845	4.71585	4.3157	5.55254	5.58892	4.91229	0.619812	0.277188
6M	4.89774	5.18876	4.42483	4.71585	4.02468	4.65037	0.446573	0.199714
2M hypoxia	9.44496	8.93567	10.2089	7.40781	8.8993	8.97933	1.0255	0.45862
	eAdora2b-/- 2M					AVG	SD	SE
2M normoxia	5.2979	4.13381	4.78861	5.51616	5.18876	4.98505	0.54421	0.243378
6M	4.17019	3.55176	4.42483	3.95192	3.6609	3.95192	0.359202	0.16064
2M hypoxia	5.55254	6.49836	5.33427	5.80719	5.73443	5.78536	0.438499	0.196103
Fig 6K
	2M	6-8M	12M
	0.194031	0.171952	0.163254
	0.200053	0.183887	0.171952
	0.196708	0.184191	0.185333
	0.188679	0.184793	0.163923
	0.190686	0.192734
AVG	0.194031	0.183511	0.171116
SD	0.00456245	0.00743171	0.0102692
SE	0.00204039	0.00332356	0.00513462
Fig 6L
	WT 2M			AVG	SD	SE
Adora2b	0.998117	0.999058	1.00283	1	0.00249128	0.00143834
BPGM	1.01848	0.983834	0.997691	1	0.0174362	0.0100668
AMPK	0.966981	1.02044	1.01258	1	0.0288642	0.0166648
	WT 23M			AVG	SD	SE
Adora2b	0.870551	0.852635	0.752623	0.82527	0.0635484	0.0366897
BPGM	0.409897	0.409897	0.480742	0.433512	0.0409024	0.023615
AMPK	1.02101	0.895025	0.926588	0.947542	0.0655551	0.0378483

## Sheet: S1 Fig
S1A Fig
	Brain				Cochlea
	WT	control	eAdora2b-/-		WT	control	eAdora2b-/-
	1.0343	0.862953	1.13215		1.0343	0.832635	1.08381
	0.963893	1.2854	0.993246		0.963893	1.21041	0.768142
	1.00181	1.03447	0.80488		1.00181	0.723078	0.745413
AVG	1	1.06094	0.976758		1	0.92204	0.865788
SD	0.0352394	0.212466	0.164256		0.0352394	0.25567	0.189154
SE	0.0203455	0.122667	0.0948333		0.0203455	0.147611	0.109208
S1B Fig
	control					AVG	SD	SE
8KHz	45	40	40	45	45	43	2.73861	1.22474
16KHz	50	45	45	50	45	47	2.73861	1.22474
24KHz	55	50	55	55	55	54	2.23607	1
32KHz	60	55	60	60	60	59	2.23607	1
	eAdora2b-/-					AVG	SD	SE
8KHz	45	45	35	45	45	43	4.47214	2
16KHz	45	50	40	45	45	45	3.53553	1.58114
24KHz	55	55	50	60	60	56	4.1833	1.87083
32KHz	55	60	50	60	60	57	4.47214	2
S1C Fig
	control 2M	eAdora2b-/- 2M	control 6M	eAdora2b-/- 6M
	20	21	27	28
	23	21	28	26
	24	25	28	25
	20	21	27	30
	18	19	23	31
	17	21	24	22
	17	17	23	20
AVG	19.8571	20.7143	25.7143	26
SD	2.79455	2.42997	2.28869	4.04145
SE	1.05624	0.918443	0.865043	1.52753
S1D Fig
	control 2M	eAdora2b-/- 2M	control 6M	eAdora2b-/- 6M
	0.00385294	0.00330952	0.0037	0.00209286
	0.0038	0.00314706	0.00301111	0.002615
	0.00354118	0.00357619	0.00309545	0.00391364
	0.00277143	0.00290741	0.00358636	0.00276923
	0.00275	0.003028	0.00296364	0.003612
	0.00282727	0.00277083	0.00251304	0.00336333
	0.0032	0.00343478	0.00269545	0.00226129
AVG	0.00324897	0.00316769	0.00308072	0.00294676
SD	0.000484947	0.000289686	0.000433713	0.000694205
SE	0.000183293	0.000109491	0.000163928	0.000262385
S1E Fig
	control 2M	eAdora2b-/- 2M	control 6M	eAdora2b-/- 6M
	9.68	8.88	9.09	8.61
	8.47	8.06	9.34	9.69
	9.03	9.19	9.44	9.23
	9.43	8.67	9.43	9.21
	11.19	8.3	8.85	9.21
	8.5	8.33	9.83	8.69
	8.68	8.45	9.3	9.22
AVG	9.28286	8.55429	9.32571	9.12286
SD	0.958953	0.385956	0.30577	0.367002
SE	0.36245	0.145878	0.11557	0.138714
S1F Fig
	control 2M	eAdora2b-/- 2M	control 6M	eAdora2b-/- 6M
	14.5	13.4	13.5	13.2
	12.4	12.9	13.9	14.2
	13.3	13.5	14.2	13.9
	13.5	13.1	14.1	13.8
	16.4	12.3	13.4	14
	11.7	12.7	14.3	13.1
	13	11.8	13.8	14.1
AVG	13.5429	12.8143	13.8857	13.7571
SD	1.53499	0.606709	0.34365	0.435343
SE	0.580171	0.229314	0.129887	0.164544
S1G Fig
	control 2M	eAdora2b-/- 2M	control 6M	eAdora2b-/- 6M
	3.8	4.42	3.29	3.46
	3.55	3.61	4.18	3.89
	3.68	4.32	3.82	3.66
	3.97	4.43	3.75	3.42
	4.36	3.62	3.45	3.39
	4.73	3.58	2.99	2.81
	4.33	3.89	2.71	3.52
AVG	4.06	3.98143	3.45571	3.45
SD	0.426615	0.397133	0.507341	0.330857
SE	0.161245	0.150102	0.191757	0.125052
S1H Fig
	control 2M	eAdora2b-/- 2M	control 6M	eAdora2b-/- 6M
	15	15.1	14.9	15.3
	14.6	16	14.9	14.7
	14.7	14.7	15	15.1
	14.3	15.1	15	15
	14.7	14.8	15.1	15.2
	13.8	15.2	14.5	15.1
	15	14	14.8	15.3
AVG	14.5857	14.9857	14.8857	15.1
SD	0.422013	0.603955	0.19518	0.208167
SE	0.159506	0.228274	0.0737711	0.0786796
S1I Fig
	control 2M	eAdora2b-/- 2M	control 6M	eAdora2b-/- 6M
	46.9	47.4	46.9	48.3
	45.8	51.1	48.3	47.5
	47.4	47	47.9	48.5
	47.7	50.2	47.1	48.4
	49.1	48.8	47.3	47.9
	44.8	50.5	46.7	48.1
	47.8	46	47.4	48
AVG	47.0714	48.7143	47.3714	48.1
SD	1.41152	1.96335	0.561885	0.341565
SE	0.533503	0.742078	0.212372	0.129099
S1J Fig
	control 2M	eAdora2b-/- 2M	control 6M	eAdora2b-/- 6M
	29.1	29	27.4	29.4
	28	32.1	28.1	26.9
	29.1	30.4	26.5	27.6
	32.9	30.1	29.5	28.6
	32.5	28.3	29.2	29.5
	32.8	28.3	30.7	27.2
	27.1	27.7	25.5	27
AVG	30.2143	29.4143	28.1286	28.0286
SD	2.45658	1.54103	1.81357	1.12356
SE	0.928498	0.582453	0.685466	0.424665
S1K Fig
	control 2M	eAdora2b-/- 2M	control 6M	eAdora2b-/- 6M
	6.37	3.37	6.78	3.38
	6.05	5.58	2.96	5.18
	2.95	7.64	5.17	6.84
	4.08	5.52	5.53	5.91
	4.99	4.96	5.5	6.4
	5.01	3.17	5.02	2.85
	4.64	5.52	3.72	4.94
AVG	4.87	5.10857	4.95429	5.07143
SD	1.15757	1.51502	1.25923	1.4956
SE	0.43752	0.572623	0.475944	0.565283
S1L Fig
	control 2M	eAdora2b-/- 2M	control 6M	eAdora2b-/- 6M
	0.06	0.1	0.09	0.11
	0.11	0.1	0.08	0.05
	0.08	0.06	0.05	0.04
	0.09	0.06	0.06	0.06
	0.09	0.06	0.08	0.07
	0.03	0.03	0.08	0.09
	0.1	0.03	0.06	0.02
AVG	0.08	0.0628571	0.0714286	0.0628571
SD	0.0270801	0.0287021	0.0146385	0.0303942
SE	0.0102353	0.0108484	0.00553283	0.0114879
S1M Fig
	control 2M (normoxia)				AVG	SD	SE		eAdora2b-/-2M (normoxia)					AVG	SD	SE
Female	62.8155	63.8462	62.8161	72.4392	65.4793	4.66532	2.33266		Female	72.8291	62.4193	60.7227	50.8498	61.7052	9.00104	4.50052
Male	60.5263	73.084	65.8209		66.4771	6.30451	3.63991		Male	71.4994	63.4189	54.0541		62.9908	8.73053	5.04057
	control 6M				AVG	SD	SE		eAdora2b-/-6M					AVG	SD	SE
Female	76.1374	68.564	84.7313	63.6303	73.2658	9.21329	4.60665		Female	37.1718	52.193	44.5087	51.1287	46.2505	6.9418	3.4709
Male	65.1592	83.8639	61.326		70.1164	12.059	6.96228		Male	35.7454	61.1111	45.6782		47.5116	12.7818	7.3796
	control 2M (hypoxia)				AVG	SD	SE		eAdora2b-/-2M (hypoxia)					AVG	SD	SE
Female	73.773	71.9737	47.3398		64.3622	14.7692	8.52702		Female	43.2022	47.8881	48.4967		46.529	2.89712	1.67265
Male	35.5283	52.9837	53.7024	52.1531	48.5919	8.73203	4.36601		Male	57.0675	34.3119	48.8633	46.2936	46.6341	9.41236	4.70618
S1N Fig
	control 2M (normoxia)				AVG	SD	SE		eAdora2b-/-2M (normoxia)					AVG	SD	SE
Female	7.37	9.07	5.8	17.53	9.9425	5.23162	2.61581		Female	7.47	23.07	32.47	12.53	18.885	11.1468	5.57341
Male	10.9	14.87	21.53		15.7667	5.37143	3.1012		Male	13.73	35.5	2.17		17.1333	16.9236	9.77086
	control 6M				AVG	SD	SE		eAdora2b-/-6M					AVG	SD	SE
Female	11.97	23.03	78.77	10.33	31.025	32.3258	16.1629		Female	21.27	179.77	27.2			89.8471	44.9236
Male	30.07	36.83	20.13		29.01	8.40031	4.84992		Male	33.43	140.43	9.33	50.07		69.7818	40.2886
	control 2M (hypoxia)				AVG	SD	SE		eAdora2b-/-2M (hypoxia)					AVG	SD	SE
Female	10.97	104.5	28.67		48.0467	49.6846	28.6854		Female	9.1	33.13	41	37.87	30.275	14.4826	7.24132
Male	47.13	61.9	27.57	19.93	39.1325	19.0153	9.50766		Male	30.43	11.77	54.27	14.13	27.65	19.5901	9.79506
S1O Fig
	control 2M (normoxia)			AVG	SD	SE				eAdora2b-/-2M (normoxia)			AVG	SD	SE
Female	50	45	45	46.6667	2.88675	1.66667			Female	45	50	40	45	5	2.88675
Male	50	45	40	45	5	2.88675			Male	45	45	50	46.6667	2.88675	1.66667
	control 6M			AVG	SD	SE				eAdora2b-/- 6M
Female	45	60	45	50	8.66025	5			Female	45	55	55	51.6667	5.7735	3.33333
Male	55	55	50	53.3333	2.88675	1.66667			Male	45	50	55	50	5	2.88675
	control 2M (hypoxia)			AVG	SD	SE				eAdora2b-/-2M (hypoxia)
Female	55	45	65	55	10	5.7735			Female	55	55	60	56.6667	2.88675	1.66667
Male	50	55	55	53.3333	2.88675	1.66667			Male	55	55	55	55	0	0

## Sheet: S2 Fig
S2D Fig
	control 2M	control 6M	eAdora2b-/- 2M	eAdora2b-/- 6M
	11.243	14.1949	13.9912	14.1692
	14.5354	13.5387	15.0281	14.1528
	14.0251	14.3341	13.8423	15.0104
	14.9621	14.1445	15.0104	13.7843
	13.9587	14.4165	15.183	15.2659
AVG	13.7449	14.1257	14.611	14.4765
SD	1.45691	0.345574	0.639433	0.629792
SE	0.65155	0.154545	0.285963	0.281652
S2E Fig
	control 2M	control 6M	eAdora2b-/- 2M	eAdora2b-/- 6M
	11.7362	12.2039	12.5616	12.8433
	12.5953	12.6002	12.6991	12.1857
	12.7754	12.1941	11.4248	14.2564
	12.7364	11.8194	11.7759	12.4687
	11.3253	12.0495	12.4265	13.0049
AVG	12.2337	12.1734	12.1776	12.9518
SD	0.661371	0.284673	0.549879	0.7964
SE	0.295774	0.12731	0.245913	0.356161
S2F Fig
	control 2M	control 6M	eAdora2b-/- 2M	eAdora2b-/- 6M
	1.57914	2.07563	1.85233	2.15841
	2.00751	1.92818	1.33191	3.39949
	1.68039	2.27069	2.00392	2.77591
	2.22109	2.60148	2.10962	1.78653
	2.14831	2.84425	1.61048	1.54298
AVG	1.92729	2.34405	1.78165	2.33266
SD	0.284506	0.376448	0.31366	0.75611
SE	0.127235	0.168353	0.140273	0.338143
S2G Fig
	control 2M	control 6M	eAdora2b-/- 2M	eAdora2b-/- 6M
	9.10624	7.6452	8.85417	8.32434
	4.1721	6.91504	8.43049	8.11373
	9.67742	5.13957	9.80736	7.45363
	7.39655	8.63882	7.17599	6.16933
	7.14967	7.3791	7.84209	4.68747
AVG	7.50039	7.14355	8.42202	6.9497
SD	2.1523	1.2856	0.999362	1.51865
SE	0.962536	0.57494	0.446928	0.679161

## Sheet: S3 Fig
S3E Fig
	control hypoxia	eAdora2b-/- hypoxia
	12.8549	12.1342
	12.8181	14.1039
	14.3173	15.2498
	12.8564	13.619
	14.2911	14.4972
AVG	13.4275	13.9208
SD	0.800463	1.1635
SE	0.357978	0.520333
S3F Fig
	control hypoxia	eAdora2b-/- hypoxia
	11.7358	12.2218
	12.9693	12.9949
	11.8613	12.5827
	12.9783	12.5577
	11.1352	11.9203
AVG	12.136	12.4555
SD	0.812561	0.405794
SE	0.363388	0.181477
S3G Fig
	control hypoxia	eAdora2b-/- hypoxia
	3.09795	3.85381
	3.84031	4.7467
	2.10489	2.03076
	3.84549	3.43867
	1.51553	2.18284
AVG	2.88084	3.25056
SD	1.04456	1.14735
SE	0.467142	0.513111
S3H Fig
	control hypoxia	eAdora2b-/- hypoxia
	6.83625	7.17241
	5.82707	9.39189
	7.8869	7.06436
	7.89193	6.87865
	5.05234	7.01994
AVG	6.6989	7.50545
SD	1.25746	1.0598
SE	0.562352	0.473958

## Sheet: Fig 6B-6D & S4 Fig
				control Hypoxia						control Normoxia						eAdora2b-/- Hypoxia						eAdora2b-/- Normoxia
No.	compound	CmpdID	Pathway	Hypoxia	Hypoxia	Hypoxia	Hypoxia	Hypoxia	Median	Normoxia	Normoxia	Normoxia	Normoxia	Normoxia	Median	Hypoxia	Hypoxia	Hypoxia	Hypoxia	Hypoxia	Median	Normoxia	Normoxia	Normoxia	Normoxia	Normoxia	Median
1	alanine	C00041	Amino acids	172558000	127792400	99131260	111803300	163960200	127792400	82100380	87979930	105286900	104774100	92910750	92910750	167234900	168837900	156002100	181706000	155181400	167234900	87595780	118007000	104576500	113052700	106955000	106955000
2	arginine	C00062	Amino acids	17324680	22236700	22241270	19733750	17501610	19733750	23471040	22699900	30448730	20142730	22706710	22706710	27116400	19803010	22050280	28430630	14450730	22050280	16252910	14634040	16010310	16459720	13935940	16010310
3	asparagine	C00152	Amino acids	7321268	3966227	3792287	7134550	7567244	7134550	5367116	5920750	7618974	6653416	6940734	6653416	6354002	7145602	6958350	7801396	8627953	7145602	7414466	8163610	8632248	6760566	9000947	8163610
4	aspartate	C00049	Amino acids	10767120	13236360	21340020	25116690	26493970	21340020	9943275	9480460	8023020	7007944	16179600	9480460	34802660	21715260	24037750	33492580	15341880	24037750	10405900	13345160	14174340	14777080	9192031	13345160
5	cysteine	C00097	Amino acids	2074.35	9895.86	2401.49	4109.23	21842.2	4109.23	4839.93	7286.79	4069.61	4926.07	11021.3	4926.07	2483.17	5092.28	3673.3	31498.2	10940.2	5092.28	4883.55	24028.2	14602.9	23816.4	5005.5	14602.9
6	glutamate	C00025	Amino acids	38186310	37162930	34849500	93212100	84399270	38186310	94111000	93912670	97279270	92879140	123843200	94111000	64501450	65106190	81317910	77948940	76235110	76235110	124099700	127630400	109932600	95024700	102822300	109932600
7	glutamine	C00064	Amino acids	145827200	86289140	84164930	147869000	177098400	145827200	177130300	154999600	212668000	185814600	230505800	185814600	156463200	175444600	148982100	166160100	168576100	166160100	243629600	249327000	244932400	222405900	253253200	244932400
8	glycine	C00037	Amino acids	32547190	18437210	18503920	32644800	38438000	32547190	26132470	27981160	29355140	31850300	27316850	27981160	28528470	29275230	31031070	30942670	34753250	30942670	30162480	31844920	30906330	29353370	31698260	30906330
9	histidine	C00135	Amino acids	6102650	6983344	8446551	5482270	6691560	6691560	5866136	6684266	7325698	7866716	6568742	6684266	8162176	7020768	6168108	8999159	6482456	7020768	5703672	5991116	5520538	5294178	5810648	5703672
10	leucine/isoleucine	C00123	Amino acids	277281200	468666000	471718000	172700400	331500300	331500300	221206800	311183300	252551500	228255700	192967100	228255700	341035500	277341200	236500700	413483100	308363600	308363600	181834000	234204000	191405200	111575100	169197700	181834000
11	lysine	C00047	Amino acids	12166500	10107020	8611425	8497998	12828350	10107020	21169370	28391970	12349840	24650560	11622760	21169370	8357316	7636374	8004532	7902188	9497537	8004532	5981708	6906402	6540826	6526674	6558466	6540826
12	methionine	C00073	Amino acids	74212150	121218500	106129500	85399980	91272740	91272740	61946550	88379060	75450500	58489440	49838640	61946550	102650300	104447100	86130440	113210200	87836960	102650300	47835780	90852960	70480570	57243590	61920880	61920880
13	phenylalanine	C00079	Amino acids	51532740	91299180	89146170	388363	74746790	74746790	56641730	64124770	58774780	52986520	45375000	56641730	90732350	72374980	64329150	106668700	80886110	80886110	49760430	59491970	52131500	37865220	46749260	49760430
14	proline	C00148	Amino acids	166670700	214722400	247546200	137207000	172368700	172368700	108829600	147000500	121272500	133256900	95922710	121272500	202330700	198486700	171504500	242188400	168398100	198486700	103027000	202170600	136363600	136012700	125070200	136012700
15	serine	C00065	Amino acids	23042050	14230690	10485150	21422290	21537550	21422290	19711770	22383780	27016450	24319710	22868000	22868000	19860150	20584000	23770970	21244950	26159510	21244950	21508230	19509830	20468730	19871650	22853770	20468730
16	threonine	C00188	Amino acids	59358020	51713870	38279710	40581260	55117100	51713870	31968380	35388350	32940700	28726150	23020670	31968380	57261820	65289260	56299490	60897530	68876260	60897530	33396130	39488850	37962640	35300800	45762600	37962640
17	tryptophan	C00078	Amino acids	4152464	8066164	9923035	46701.2	6044320	6044320	6566482	7303376	6845896	3657239	4475382	6566482	10158510	7110704	6776784	20317940	7027158	7110704	5952190	6599032	6219688	3142123	5769576	5952190
18	tyrosine	C00082	Amino acids	45497100	109066300	142988400	79849900	119991500	109066300	95768650	95109090	93317470	63840720	61819150	93317470	131694800	111150900	110256300	138540900	84194640	111150900	69400920	95160640	77883820	69787450	65897080	69787450
19	valine	C00183	Amino acids	279621900	449988200	445131000	196383200	281475600	281475600	286222700	321825200	271851500	248478100	218769600	271851500	322633000	313172100	252684400	366308800	283097800	313172100	234257300	234853900	259212800	284994200	242829100	242829100
20	kynurenine	C00328	Amino acids	619973	953588	726597	500	762447	726597	965982	1120289	880645	394171	514149	880645	823121	829739	874620	1050138	563900	829739	405093	753530	507042	183011	424708	424708
21	ATP	C00002	Nucleotides	20736150	6767260	4405502	5341132	8050044	6767260	3329194	2908158	3589649	3158975	4618234	3329194	2858790	7341314	6333268	11817600	2940299	6333268	6180470	4526876	3528637	1780378	4839242	4526876
22	ADP	C00008	Nucleotides	6952646	19312120	7651550	5204786	10813160	7651550	13316860	9425495	14293640	13079760	11079760	13079760	21709190	20478290	14928890	12325080	11238380	14928890	12481930	14561020	9034436	15712360	13117650	13117650
23	AMP	C00020	Nucleotides	1145449	6392272	2282782	844818	2884110	2282782	5454940	3433342	4853390	3141695	2261575	3433342	4921024	4963845	2962896	16269740	4488484	4921024	4125165	4100582	4273854	4627342	3116035	4125165
24	Hypoxanthine	C00262	Nucleotides	1500045	1785588	1967000	2947142	4007824	1967000	8302562	9676093	9982193	2625074	3535499	8302562	5482322	3243702	4557562	11526170	3265573	4557562	7547882	6478224	3416563	3464425	3440377	3464425
25	Xanthine	C00385	Nucleotides	53880.1	46374.9	79707.6	35498.9	73299	53880.1	193547	180565	187482	48802.9	63054.6	180565	270558	54824.2	184231	694132	132735	184231	262950	192755	117313	118561	111870	118561
26	Guanine	C00242	Nucleotides	3406608	5262988	4827655	8128.06	4243040	4243040	2863054	4204658	3127175	2433944	2497661	2863054	4641778	4797743	3851507	5842476	4053494	4641778	2521371	4086118	2956364	2617890	3046095	2956364
27	Allantoate	C00499	Nucleotides	71144.5	60340.4	210825	83585.3	72811.4	72811.4	32042.3	28272.1	42329.8	29913.2	33333.8	32042.3	133196	84924.3	103221	199274	70674.9	103221	36109.9	59892.9	54378.8	81817.9	54341.6	54378.8
28	(S)(+)-Allantoin	C02350	Nucleotides	317027	449796	456212	1946385	522894	456212	1105257	801911	946251	1084640	1190456	1084640	427197	586269	537165	561804	578861	561804	944580	1021766	818248	727000	927244	927244
29	5-Hydroxyisourate	C11821	Nucleotides	19336850	15351160	16055140	10513140	24019350	16055140	23565030	17426070	23936920	20009380	20815300	20815300	25377810	27133970	22969130	25487690	18665570	25377810	24681520	22248040	25094860	26458140	23817860	24681520
30	5--Phosphoribosyl-N-formylglycinamide	C04376	Nucleotides	647052	497001	1388179	100605	385897	497001	156658	50327.1	99745.7	168579	153746	153746	1315011	1100974	1036482	102275	241065	1036482	124126	259267	159100	669428	285914	259267
31	UTP	C00075	Nucleotides	282630	243688	344466	77412.1	1610187	282630	1082840	800527	1123578	876923	833185	876923	998376	452080	911414	689293	1028610	911414	967844	899540	847284	1198469	1103601	967844
32	UMP	C00105	Nucleotides	3073.48	18399.4	6019.51	8411.13	500	6019.51	3929.12	500	4867.73	500	6208.03	3929.12	5529.93	2538.39	2891.2	55061.3	2988.21	2988.21	4324.28	2301.26	2756.27	500	500	2301.26
33	GMP	C00144	Nucleotides	79924.6	155832	44401.2	193079	79287.9	79924.6	185297	162197	192981	192908	130931	185297	111117	98641.8	39797.4	286473	206863	111117	309840	194648	253059	110759	90430.7	194648
34	IMP	C00130	Nucleotides	78231.7	106150	79761.6	105312	59656	79761.6	323766	144583	147998	92564.6	13342.4	144583	111274	89016.7	73876.5	300852	89204.2	89204.2	197366	500	24469.9	66502.5	43021.2	43021.2
35	CMP	C00055	Nucleotides	31927.3	29060.4	48294.4	48640.2	41275	41275	27130.3	23118.8	52885.3	27325.4	36575	27325.4	85113.1	45654.2	46646.5	268678	40624.2	46646.5	30065.3	45874.2	3615.51	40831.1	3901.33	30065.3
36	Cytidine	C00475	Nucleotides	600305	492759	212312	976781	288538	492759	627034	748824	678130	336572	768415	678130	287669	343367	295254	231712	377681	295254	419063	364661	312104	399453	313340	364661
37	2--3--Cyclic CMP	C02354	Nucleotides	22476.1	9646.21	70465	52713.4	50614.3	50614.3	23412.4	5611.44	17928	14646.2	35084	17928	84666.8	19047.2	27806.8	545406	7608.13	27806.8	9449.17	7413.54	21123.5	22956	9303.42	9449.17
38	5-6-Dihydrothymine	C00906	Nucleotides	6953282	6151934	6496042	4609594	5078490	6151934	5112762	3278572	5930810	3875822	5342856	5112762	4017010	4141766	3691247	3701605	3575383	3701605	5252956	4412489	4723632	5092222	5140640	5092222
39	Thymine	C00178	Nucleotides	78004.2	68966.3	132205	94776.4	92775.9	92775.9	95652.2	115898	117753	118684	86760.8	115898	153256	118539	151596	204728	194904	153256	178932	130552	170138	226253	202654	178932
40	Thymidine	C00214	Nucleotides	125675	71247.7	104364	57785.6	48689.7	71247.7	60938	56125.9	100275	67557.6	39966.1	60938	235474	110440	87679.8	256343	102324	110440	37447.7	75506.3	179694	145446	120356	120356
41	3--5--Cyclic IMP	C00943	Nucleotides	304692	422594	375802	276262	268934	304692	245352	5459.27	71878.9	23847.7	162898	71878.9	380063	343766	387100	61523.4	500	343766	99062	219638	166528	143908	198664	166528
42	Pyridoxal	C00250	Nucleotides	217749	195518	146574	332646	324402	217749	429891	433272	401992	267552	346091	401992	173693	210355	225974	126521	295992	210355	386258	269629	377837	241774	220139	269629
43	4-Pyridoxate	C00847	Nucleotides	2208175	2559239	1849443	2844323	3328145	2559239	4197572	4468270	4220674	3315227	3494980	4197572	2111789	3121073	2928673	1423048	3363912	2928673	3667016	3198979	3924918	3017645	2794739	3198979
44	Pyridoxamine phosphate	C00647	Nucleotides	500	1386.88	500	500	500	500	500	500	500	500	500	500	500	2063.86	500	500	500	500	500	500	500	500	500	500
45	Nicotinamide	C00153	Nucleotides	37252480	50971760	77062230	9093951	46381010	46381010	22611180	18214630	16392430	13138940	16462590	16462590	98049900	46031880	68708130	131027800	31080590	68708130	16942210	44434570	14464100	15897050	13351240	15897050
46	Adenine	C00147	Nucleotides	2626464	3456710	3535167	3764121	5237352	3535167	5602056	5381292	6263588	6970822	5766728	5766728	3895221	3654875	3924233	3760550	5616562	3895221	6243548	4887496	5581682	4155938	4082021	4887496
47	Adenosine	C00212	Nucleotides	283958	598110	1758036	336708	782584	598110	516834	369573	391170	332364	404232	391170	1414595	368936	651463	2310329	344613	651463	294522	378797	447934	421296	191429	378797
48	Guanosine	C00387	Nucleotides	191202	352532	272924	245608	291802	272924	341496	310917	347222	239294	290317	310917	355410	326432	333988	401026	295072	333988	336238	231568	271368	361447	314306	314306
49	Inosine	C00294	Nucleotides	3475035	9340453	3377750	2012255	2865933	3377750	5026716	5141860	4450156	2646891	3108235	4450156	2748850	3634715	2649583	2540043	4438688	2748850	2423544	5462282	3723794	3965065	4562989	3965065
50	NAD+	C00003	Nucleotides	6230510	7622362	4567258	7273932	10205260	7273932	11519570	12619460	12705820	10261560	10354630	11519570	4454722	8502150	5738184	3553210	9782656	5738184	11027310	9322074	9202451	9201565	9790354	9322074
51	Purine	C15587	Nucleotides	333219	409000	425253	380486	351561	380486	383181	369053	371544	350060	361827	369053	424429	452499	401938	477328	405767	424429	402546	402696	428613	415976	368923	402696
52	Flavin	C00176	Nucleotides	1268444	3232633	2847313	353576	2186872	2186872	2552358	1592588	2728550	1539321	1430764	1592588	1443401	1744097	1649441	1474592	1315554	1474592	1539208	997640	1187502	2206957	1385258	1385258
53	Nicotinate ribonucleotide	C01185	Nucleotides	881337	833838	1788440	1016279	45497.7	881337	434928	11215	10952.5	9998.22	28410.2	11215	28939.8	1342930	1233598	2400950	16061.6	1233598	9810.5	16389.5	977408	500	793545	16389.5
54	N6-(1-2-Dicarboxyethyl)-AMP	C03794	Nucleotides	53823.6	106852	111293	147103	90068.7	106852	68976.2	69518.5	75288.1	52722.2	78957.7	69518.5	69145.7	64118.3	41707.2	186689	60215.1	64118.3	58417.8	56189	30351	44959	40174.4	44959
55	3--5--Cyclic AMP	C00575	Nucleotides	454895	826070	662843	398486	470391	470391	374486	393175	567219	220114	146434	374486	575123	859825	609089	670562	649056	649056	567116	420364	539074	945144	381282	539074
56	5-Phosphoribosylamine	C03090	Nucleotides	73353.5	75729.1	103744	53058.3	39828.6	73353.5	15686.1	9035.99	11772.2	52244.1	62430.6	15686.1	183178	89250.3	132983	76335.5	41650.6	89250.3	14186.6	108623	40287.2	58119.2	18551.1	40287.2
57	Orthophosphate	C00009	Phosphates	61920960	62883110	59899050	61175410	71160390	61920960	47776900	37689210	48951090	66811250	70902180	48951090	80045700	67491670	62189920	96986660	73042180	73042180	59134620	69548780	70710570	76099200	67230220	69548780
58	Diphosphate	C00013	Phosphates	3417211	3059185	3320827	3717461	3604525	3417211	2036172	1497734	2006314	3821756	4689456	2036172	5502676	4200104	3425616	6059924	3714335	4200104	2844077	3439337	4003315	4557968	3692671	3692671
59	Triphosphate	C00536	Phosphates	99890.1	82838	80218.3	78794.1	78485.7	80218.3	83746.8	74148.4	90903.8	67800.5	73975.8	74148.4	100622	74999.7	101488	49249	93987.6	93987.6	78281.3	84383.8	77802.6	83473.2	63364.9	78281.3
60	D-Glucose	C00031	Glycolysis	50029600	77537260	84253760	55576560	74107620	74107620	83369370	75288940	69138120	60732770	76362920	75288940	67292650	80612330	76848950	75338910	86897610	76848950	90479550	73308830	85533110	93691850	85689850	85689850
61	D-Glucose 6-phosphate	C02965	Glycolysis	3606055	2448078	2083745	7171622	4169105	3606055	12029630	11883110	13647180	9123265	8524809	11883110	3571193	3598105	4229308	9080489	11782380	4229308	12226910	9284063	9515195	8977581	6934286	9284063
62	D-Fructose 1-6-bisphosphate	C00354	Glycolysis	1276426	7213618	18201260	449946	635501	1276426	8976017	7363968	2813886	4487756	3222588	4487756	2922182	1789529	1799146	605544	979803	1789529	950187	2697118	906278	4644452	1346354	1346354
63	D-Glyceraldehyde 3-phosphate	C00118	Glycolysis	2049456	1788282	1066812	1589994	1796170	1788282	3651225	3771016	4603364	3475536	2728354	3651225	2235689	1752001	2692563	2724722	2646488	2646488	3094500	3376277	1888042	2963933	3298245	3094500
64	2-3-Bisphosphoglycerate	C03339	Glycolysis	7051230	648000000	1310000000	388000000	112000000	388000000	110000000	268000000	265000000	219000000	243000000	243000000	149000000	299000000	214000000	170000000	185000000	185000000	205000000	195000000	229000000	138000000	248000000	205000000
65	2/3-Phospho-D-glycerate	C00631	Glycolysis	29606310	59911710	42341850	39142900	40097320	40097320	57059400	52097940	58759230	51768320	48716440	52097940	43621850	60080020	39343620	55725800	38876150	43621850	41223900	46664860	29065880	42811600	34721770	41223900
66	Phosphoenolpyruvate	C00074	Glycolysis	2219339	564383	5483908	216200	1950339	1950339	1974974	3077555	2805304	344984	3064277	2805304	448340	1281435	2019722	1001085	3716236	1281435	2349054	983341	2515101	1755099	1256986	1755099
67	Pyruvate	C00022	Glycolysis	3377456	4461256	4457880	3614786	4226424	4226424	4157840	3945985	4178518	3813634	3954123	3954123	4252746	3768750	4024492	3965352	4343744	4024492	4434142	3775228	4439700	4578614	3759637	4434142
68	Lactate	C01432	Glycolysis	169889000	186471200	245731700	80828890	159895600	169889000	137981500	109437100	129375000	115996700	77176680	115996700	237885800	208219800	216115700	247659900	160397600	216115700	110799900	90804870	115045900	59582640	83957930	90804870
69	Maltose	C00208	Other sugars	370690	440632	281854	204918	377700	370690	290191	292545	218328	213390	200275	218328	343779	411049	248852	639966	322754	343779	401311	200125	258432	229587	258926	258432
70	Mannitol	C00392	Other sugars	765991	1543937	1343871	1049514	1022478	1049514	933842	858663	604313	779954	545010	779954	931681	1134140	1255394	1399771	943242	1134140	732336	823343	649159	1079281	692581	732336
71	D-Sorbitol	C00794	Other sugars	745051	1271921	1585994	1003520	1055563	1055563	924726	857236	774088	765057	657348	774088	1080326	1023459	1027213	1293274	749130	1027213	600980	824338	738189	1039436	587703	738189
72	D-Ribose	C00121	Other sugars	3349679	2667918	5829964	1270216	1668357	2667918	1853268	2036708	2336900	1579268	1541590	1853268	2464919	3115482	2875265	2653131	2374185	2653131	2027606	1749644	2249706	2223553	2033682	2033682
73	D-Rhamnose	C01684	Other sugars	973434	781553	938942	478165	288200	781553	994607	678912	1451376	727821	698524	727821	732466	784714	784586	912510	576318	784586	424866	461154	594625	509827	509404	509404
74	D-Arabitol	C01904	Other sugars	57256.5	114542	116442	131481	75924.9	114542	65768.4	99301.3	74761.7	67116	96926.2	74761.7	76767.8	84140.2	102348	104415	89792.9	89792.9	114027	85706	142608	107172	118810	114027
75	Citrate	C00158	Carboxylic acid	1864226	1994143	8048918	1719182	2107440	1994143	1750744	1362695	1461560	1440532	1690290	1461560	6563786	3862576	4403600	4524957	1606911	4403600	1089012	2515182	1422356	2805188	2250075	2250075
76	2-Oxoglutarate	C00026	Carboxylic acid	34966.5	75745.4	39081.4	36572.9	65700.4	39081.4	64479.8	61030.4	64195.2	81884.5	87516.3	64479.8	95414.4	81586.3	73905.2	92191.3	61707.5	81586.3	104236	62009.4	77299.4	77999.1	59745.3	77299.4
77	Succinate	C00042	Carboxylic acid	834563	741230	1348276	555170	909807	834563	991083	910134	1081714	1328015	828901	991083	1025441	819411	1094020	971107	897598	971107	1429398	1110088	2173657	1637848	1284960	1429398
78	Fumarate	C00122	Carboxylic acid	1006713	767349	1171389	555148	921865	921865	610943	474865	608273	505686	499531	505686	1248763	993437	1236713	1749240	748864	1236713	759526	605214	541167	900601	681165	681165
79	Malate	C00149	Carboxylic acid	9295847	15385570	21862460	5033392	7865414	9295847	12990860	10307840	11963050	9903067	8473301	10307840	19007370	15303650	13689460	22999370	10782430	15303650	13300770	12234550	11200880	15396890	12790720	12790720
80	Oxaloacetate	C00036	Carboxylic acid	482776	474141	466740	543628	512624	482776	520402	528996	526358	558038	557517	528996	519296	542832	579324	584924	533300	542832	539744	544279	570725	562951	527548	544279
81	5-Aminolevulinate	C00430	Carboxylic acid	803675	967419	1218578	883993	761556	883993	811608	833781	829244	843098	1053514	833781	814014	960264	719985	895645	915012	895645	1008384	957263	1128572	1074017	884154	1008384
82	2-Hydroxyglutarate/Citramalate	C02630	Carboxylic acid	2612114	3092623	2046046	1413402	2605171	2605171	2319896	2472762	2893336	2286923	1915675	2319896	2687508	1932862	2811535	3067645	1797176	2687508	2241510	2075574	2213562	2507056	2507154	2241510
83	6-Phospho-D-gluconate	C00345	Pentose Phosphate Pathway	295853	1048096	328790	726933	920733	726933	1075392	731282	1123539	1255245	965456	1075392	682288	560652	450250	3021160	1448443	682288	799145	1240432	1568468	915220	981217	981217
84	D-Glucono-1-5-lactone 6-phosphate	C01236	Pentose Phosphate Pathway	343642	630234	243899	411602	308473	343642	763408	882760	770107	470300	724235	763408	223265	460163	330006	307068	379378	330006	498259	504271	400390	469262	536002	498259
85	D-Erythrose 4-phosphate	C00279	Pentose Phosphate Pathway	138090	163723	205429	130242	177515	163723	226582	298188	274880	328045	279678	279678	165788	145006	142285	149028	186998	149028	228976	331110	129462	238036	240453	238036
86	Sedoheptulose 1-phosphate	C06222	Pentose Phosphate Pathway	5539892	3564959	3837979	7619942	9007819	5539892	7432016	5301348	6623348	6764466	6999076	6764466	4727934	5767752	4595940	9852781	9717239	5767752	6700942	9019615	4921356	4477468	4470698	4921356
87	alpha-D-Ribose 1-phosphate	C00620	Pentose Phosphate Pathway	4111504	3023392	3971744	4668466	8491792	4111504	8903569	6915744	7505246	6326654	5986026	6915744	6884134	7310244	7207634	22666460	9473923	7310244	7462906	13420810	5119712	5836950	6387902	6387902
88	Glutathione	C00051	GSH homeostasis	101365	1252345	247077	9245.95	500	101365	1232566	585017	1601647	1631409	968762	1232566	171362	500	500	676753	500	500	1704519	6718746	3188551	2223219	5667034	3188551
89	Glutathione disulfide	C00127	GSH homeostasis	100863000	131709400	130697400	87058260	100126800	100863000	136493100	128771500	125678600	127435500	130486900	128771500	143873000	159642300	124134100	158748300	134649600	143873000	146622600	163634300	167313800	161546900	106600900	161546900
90	5-Oxoproline	C01879	GSH homeostasis	99663610	68671610	71607110	106927700	125820600	99663610	134326400	118422600	148415700	141988500	165917300	141988500	113152300	122802300	107546700	125009200	122416200	122416200	171829100	169078900	177992500	156293500	179276600	171829100
91	S-Glutathionyl-L-cysteine	C05526	GSH homeostasis	3308000	3651703	4651156	6263936	7935934	4651156	3808824	4338092	3297723	3556695	4168801	3808824	12091510	6532138	5753060	10500610	5237382	6532138	3237598	4793258	3836835	3529881	3604079	3604079
92	Ascorbate	C00072	GSH homeostasis	830673	1575600	1865677	906659	1634673	1575600	1625350	1657555	1638390	1243495	1660947	1638390	1603475	1663242	1483442	1706718	1512752	1603475	1994973	1429096	1495050	2110255	1986260	1986260
93	Dehydroascorbate	C05422	GSH homeostasis	415608	604768	1181769	755659	447999	604768	552388	492389	612075	385337	410198	492389	974853	531763	601053	761662	617992	617992	407000	419222	567733	416792	501425	419222
94	gamma-L-Glutamyl-L-cysteine	C00669	Gamma-glutamyls	3160.67	12150.4	15122.1	11315.1	5348.2	11315.1	3332.59	1799.05	4623.54	1224.07	9193.71	3332.59	6383.89	5063.85	5327.62	17402.6	31727.2	6383.89	2704.86	4722.96	12140	8397.34	5643.81	5643.81
95	gamma-Glutamyl-Se-methylselenocysteine	C05695	Gamma-glutamyls	331332	264220	52695.8	348010	331344	331332	224184	199472	261357	292701	312298	261357	322171	317413	179859	564382	454624	322171	273694	307291	201866	159155	220896	220896
96	gamma-L-Glutamyl-D-alanine	C03738	Gamma-glutamyls	641546	1211970	2174131	80556.4	729163	729163	696285	795746	793867	653152	747584	747584	1356281	1143929	1196109	1258225	690381	1196109	458926	1179777	804637	863323	780066	804637
97	gamma-Glutamyl-gamma-aminobutyrate	C15767	Gamma-glutamyls	136359	77943.6	290176	127398	289888	136359	135734	167274	178020	132786	158126	158126	337771	269534	180963	470860	137129	269534	163376	329204	287949	342313	213215	287949
98	(5-L-Glutamyl)-L-glutamine	C05283	Gamma-glutamyls	2514393	5062992	4221704	3793909	3681196	3793909	7288234	7694184	6739390	4304370	5825430	6739390	4528934	4884874	3264676	4459438	4787010	4528934	4554534	6565786	6141172	6041484	4832586	6041484
99	5-L-Glutamyl-taurine	C05844	Gamma-glutamyls	753023	898615	874874	247341	828499	828499	665806	460206	398527	433001	428571	433001	1225583	866355	1011586	312250	643233	866355	548039	1278367	601085	1419770	964344	964344
100	gamma-L-Glutamyl-[acp]	C18006	Gamma-glutamyls	477204	611276	342744	67182.2	496293	477204	391438	326320	355420	338156	362219	355420	500488	269541	540085	120936	315014	315014	360764	463301	323930	656637	522714	463301
101	L-Homocysteine	C00155	Serine biosynthesis and one-carbon metabolism	24919.5	175406	167404	95635.3	248208	167404	484258	364395	402946	19173.5	424488	402946	41276.4	52042.4	61874.4	375003	40418	52042.4	210702	417380	240156	236829	181646	236829
102	L-Homoserine	C00263	Serine biosynthesis and one-carbon metabolism	56663750	39894900	30438710	50961010	57449720	50961010	36007670	43031490	35981040	32785760	25275880	35981040	55347070	65990350	55074910	58712430	75548130	58712430	36680290	37731920	40014110	32237720	42399390	37731920
103	N-N-Dimethylglycine	C01026	Serine biosynthesis and one-carbon metabolism	5974662	7690972	7425204	6367044	5928140	6367044	7120842	7143404	8527825	4369934	3866877	7120842	6683052	7019934	6542736	7514292	5467047	6683052	3805656	5001632	5718238	5476166	6082158	5476166
104	D-O-Phosphoserine	C02532	Serine biosynthesis and one-carbon metabolism	1134683	418240	677150	980891	1060064	980891	1208068	1155485	1196887	707170	700377	1155485	1310611	1537384	1503119	1395876	1007784	1395876	1530735	1512248	1445807	1735422	1145736	1512248
105	S-Adenosyl-L-homocysteine	C00021	Serine biosynthesis and one-carbon metabolism	529734	503596	609552	740145	848447	609552	388726	644769	329544	379395	658841	388726	882248	746313	499688	744073	618968	744073	440200	754955	506385	452195	168871	452195
106	S-Adenosyl-L-methionine	C00019	Serine biosynthesis and one-carbon metabolism	929002	1390422	1467181	376532	1266003	1266003	1410401	1164975	1174077	216117	646969	1164975	2060938	1437281	1912870	2615392	946996	1912870	1294848	1189495	1376827	1425556	1027353	1294848
107	Sarcosine	C00213	Serine biosynthesis and one-carbon metabolism	172558000	127792400	99131260	111803300	163960200	127792400	82100380	87979930	105286900	104774100	92910750	92910750	167234900	168837900	156002100	181706000	155181400	167234900	87595780	118007000	104576500	113052700	106955000	106955000
108	5-10-Methenyltetrahydrofolate	C00445	Folate pool (One carbon metabolism)	8662389	25788960	27411130	32042.6	9207239	9207239	8781470	3840135	1176912	8823047	4028492	4028492	11666380	12061750	14011060	15772320	6052942	12061750	13478780	1111134	2577330	5562274	15805570	5562274
109	Ornithine	C01602	urea cycle and polyamines	998326	660488	1083876	874498	581167	874498	647072	504657	645804	490379	501635	504657	700953	799441	684581	791998	746715	746715	558619	573239	630222	763638	630848	630222
110	L-Citrulline	C00327	urea cycle and polyamines	31390430	23772470	19230420	30988620	25160830	25160830	39379320	41402230	50897390	42181710	41028920	41402230	31537990	36779470	32587400	32253010	34725770	32587400	34559970	39751520	44805410	36139110	46656770	39751520
111	N-(L-Arginino)succinate	C03406	urea cycle and polyamines	251086	235542	201181	461642	291371	251086	503736	406506	707637	474017	679702	503736	396197	388356	504945	379864	296430	388356	327592	387152	388468	506755	280026	387152
112	Urate	C00366	urea cycle and polyamines	157274	420940	669715	44817.6	310115	310115	260029	151202	219083	203806	99100.2	203806	462128	408895	417830	691500	249855	417830	464558	298096	227049	253788	560370	298096
113	Putrescine	C00134	urea cycle and polyamines	208197	271358	502532	272594	328710	272594	144600	162532	166875	65593.5	116962	144600	590633	245065	394481	632839	190432	394481	165023	156324	158840	254751	66686.9	158840
114	Spermidine	C00315	urea cycle and polyamines	30186690	49183410	97648580	25002850	45594220	45594220	28501970	23764390	23725670	13049610	17646540	23725670	91573980	48874200	68614420	109205700	29203060	68614420	24384490	28311580	26089670	44014330	20494780	26089670
115	Spermine	C00750	urea cycle and polyamines	269610	348986	214648	69762.5	129953	214648	150727	183921	160905	230042	297390	183921	642278	176904	117892	199122	101894	176904	60980.6	112589	161819	39227.2	131302	112589
116	Atherospermidine	C09347	urea cycle and polyamines	138649	73735.2	105764	70842.3	220137	105764	104278	110158	93151.1	96912.8	93068.6	96912.8	234994	182760	173887	346614	185118	185118	117075	106826	111599	97511.1	104812	106826
117	N-Acetylneuraminate	C00270	Aminosugars	2219041	3592186	2035021	1430615	2168880	2168880	2750272	2306563	2674980	1348602	1287822	2306563	2247790	2738154	1950340	2472862	2497812	2472862	1712949	3376192	1914786	2998711	2285718	2285718
118	N-Glycoloyl-neuraminate	C03410	Aminosugars	179848	323393	311380	133124	217286	217286	201154	169138	151027	48456.9	83475.3	151027	244704	271402	196927	210389	198955	210389	100658	266244	184203	207511	223321	207511
119	alpha-D-Glucosamine 1-phosphate	C06156	Aminosugars	278038	177960	114269	332408	192465	192465	289165	272398	381262	210931	219793	272398	112579	183251	188463	104846	193818	183251	259875	177734	237696	181678	240532	237696
120	D-Glucosamine	C00329	Aminosugars	424847	407964	188623	538479	756882	424847	544948	715353	692146	520462	794525	692146	247989	282074	319657	211745	483274	282074	515446	540289	550925	455228	389171	515446
121	L-Arabinose	C00259	Aminosugars	2279897	2083062	4299406	2079299	1810091	2083062	1756254	1695629	1824058	1518404	1747420	1747420	2055140	2193374	1944141	2093117	1776755	2055140	2278116	1566096	2021213	2278882	1687902	2021213
122	1-4-beta-D-Xylan	C02352	Aminosugars	1529834	2372435	2483779	1762385	2339994	2339994	2153593	2188158	2204619	1901085	2205177	2188158	2365657	2059981	2212658	2365536	2373160	2365536	3057907	2046434	2514348	2854439	2017307	2514348
123	Glycolate	C00160	Aminosugars	40346370	43946590	41328070	38919060	37388600	40346370	39307260	41798360	45701780	40131310	37169350	40131310	39922510	41003000	39666350	39151200	41685500	39922510	44255260	41509680	42634440	45142300	43281390	43281390
124	beta-L-arabinose 1-phosphate	C03906	Aminosugars	409964	463825	563596	511491	833880	511491	713688	569312	582545	567666	530104	569312	705149	712739	636953	2289431	814302	712739	586091	1078010	492342	568167	663888	586091
125	UDP-N-acetyl-D-glucosamine	C00043	Aminosugars	559131	845095	285423	1235862	677298	677298	1070398	1007718	1017567	930481	978983	1007718	763711	553208	514228	2034452	843859	763711	428446	704744	597728	607920	463789	597728
126	CMP-N-acetylneuraminate	C00128	Aminosugars	9585839	12654290	13054330	8491216	9709256	9709256	13615360	12892740	12214670	12302760	12646010	12646010	14607310	15754310	11711350	15018260	13139470	14607310	14324590	16220540	16737690	15523800	9785101	15523800
127	gamma-L-Glutamylputrescine	C15699	Arginine and proline metabolism	45130.1	44625.3	32058.1	41857.8	44209.8	44209.8	38876.1	48714.8	51499.3	45720.9	49597.1	48714.8	51186.7	47513.4	43051.9	57021.5	39050.8	47513.4	50677.8	43246.4	43493.2	42090.5	43710.1	43493.2
128	5-Guanidino-2-oxopentanoate	C03771	Arginine and proline metabolism	393950	605417	722376	338378	545782	545782	591172	828368	587114	758465	612106	612106	501172	788825	537513	604438	698235	604438	705284	547838	619640	668424	497209	619640
129	Phosphocreatine	C02305	Arginine and proline metabolism	54543.9	96514	500	9988.62	64355.7	54543.9	41898.1	25164.6	8309.4	10783.2	4063.55	10783.2	450390	126186	225220	364042	83520.9	225220	26466.7	145876	55111.1	65040.2	38011.2	55111.1
130	Creatine	C00300	Arginine and proline metabolism	310679600	394500300	347140900	200372300	462424200	347140900	316608900	380824700	296716000	314196900	257527900	314196900	501067800	405351300	386259200	569042000	378604800	405351300	320942200	349752400	299305000	318238500	286120200	318238500
131	Creatinine	C00791	Arginine and proline metabolism	8662409	9278421	9517410	9577433	13909840	9517410	11517810	12516870	11971370	6968718	6672262	11517810	9227788	13105950	8735366	11457040	11522150	11457040	8415544	10345700	11635920	9889853	9363486	9889853
132	4-Acetamidobutanoate	C02946	Arginine and proline metabolism	467937	605421	630542	654623	797297	630542	503621	640980	558006	501334	503592	503621	775990	714811	665438	750004	624460	714811	508820	560068	586038	574211	651966	574211
133	N-Acetylornithine	C00437	Arginine and proline metabolism	4241478	7132042	9483915	5975086	3411432	5975086	5680896	5988468	10113620	6873390	7284734	6873390	11205120	13672720	8263380	10526240	6833644	10526240	8744417	6491636	7385670	8770467	8222736	8222736
134	N-Succinyl-L-glutamate	C05931	Arginine and proline metabolism	90102.2	113652	135162	53463.1	101851	101851	91645.3	88665.1	86351.5	56036.2	61083.3	86351.5	104920	116992	121411	103000	50562.4	104920	81084.4	62398.6	107178	77809.6	46482.6	77809.6
135	N-Succinyl-L-glutamate 5-semialdehyde	C05932	Arginine and proline metabolism	95959.7	377525	396286	14680.8	90273.4	95959.7	118935	52880.2	72781.5	137577	68285.1	72781.5	121615	120300	244162	293023	109491	121615	174362	104080	36154.2	115812	252768	115812
136	L-1-Pyrroline-3-hydroxy-5-carboxylate	C04281	Arginine and proline metabolism	103028100	49476890	53246300	108047400	144468300	103028100	142691300	132874500	173126500	140920000	192673200	142691300	114766500	131855100	106348600	115187900	135094900	115187900	173908400	163523800	179739600	140886000	189323900	173908400
137	Asymmetric dimethylarginine	C03626	Arginine and proline metabolism	619671	768285	646185	825941	596946	646185	972379	816268	1057021	900426	873688	900426	966515	628443	688649	1081005	541608	688649	621373	677512	713374	672796	582280	672796
138	Aminofructose 6-phosphate	C12214	Arginine and proline metabolism	819424	975336	1030190	925984	733997	925984	774579	558902	1065952	676523	663505	676523	1029025	981071	1106304	905338	796960	981071	715346	819991	745442	853989	614739	745442
139	N-Succinyl-L-citrulline	C18048	Arginine and proline metabolism	1690067	3680365	3506101	2571037	1920578	2571037	3630948	3380508	3838881	2440061	3373170	3380508	2495579	3090503	2091683	2840221	2808032	2808032	2588656	4157213	3423353	3804886	3042197	3423353
140	Guanidinoacetate	C00581	Arginine and proline metabolism	2995867	3076923	1219208	1395196	2395620	2395620	4120450	6559506	3506845	5831548	2957781	4120450	1524121	1864580	2343572	1991764	1744748	1864580	2386846	2411991	2466488	2031498	2297973	2386846
141	trans-4-Hydroxy-L-proline	C01157	Arginine and proline metabolism	10892480	7917026	9355371	10890460	9338009	9355371	9771699	9272199	10393230	11351560	14529510	10393230	10225340	11936640	9684417	9967639	12512160	10225340	12196020	14110560	14689120	16526990	13321030	14110560
142	Pantothenol	C00864	Panthothenate metabolism	185113	309420	183505	19352.3	63322.1	183505	181015	156922	209506	69713.7	65534.5	156922	287924	286663	275150	401743	94932.8	286663	60701.7	74394.4	51248.9	65009.1	63316.2	63316.2
143	Uracil	C00106	Panthothenate metabolism	98160.5	115777	110238	111110	197426	111110	340221	136045	169956	182598	144882	169956	272690	170078	113104	124057	296218	170078	279000	204369	252256	204621	155429	204621
144	5-6-Dihydrouracil	C00429	Panthothenate metabolism	977473	761348	798589	886587	855713	855713	821258	903082	688377	766214	906315	821258	700830	695311	778213	743047	932389	743047	691268	644552	854604	646964	665780	665780
145	Pantetheine	C00831	Panthothenate metabolism	19115.7	41692.3	133309	37887.3	46825.9	41692.3	20351.1	26791.7	29876.4	45970.9	14779	26791.7	106087	37959.6	56002.2	167437	47994.6	56002.2	8791.39	33988.7	31563.2	11017.9	12591	12591
146	Pantetheine 4--phosphate	C01134	Panthothenate metabolism	304704	468760	259053	583839	407687	407687	555842	447010	501484	417101	430715	447010	487260	491375	228994	255669	504708	487260	436161	597261	561455	659972	458350	561455
147	D-4--Phosphopantothenate	C03492	Panthothenate metabolism	22853.1	21324.1	5103.66	20381.6	15354.7	20381.6	31301.8	32367	48815.9	27024	25564.5	31301.8	24381.1	52825.7	22593.1	49615.7	18714.4	24381.1	53265.6	32043.5	29987.5	24352.8	33826.3	32043.5
148	L-Selenomethionine	C05335	Sulfur metabolism	47514.2	46868.5	45954.8	50371.7	48273.6	47514.2	45126.8	40134.5	49468.8	42040.9	38047.8	42040.9	59172.7	59046.6	58076.9	79840.3	51241.9	59046.6	37876.8	52417.9	48824.6	47568.7	57997.9	48824.6
149	(R)-S-Lactoylglutathione	C03451	Sulfur metabolism	624480	1278965	2352608	616853	1191531	1191531	1486022	895836	1070873	878455	1084512	1070873	1425539	1263239	1547196	487073	985178	1263239	743725	1066223	1117945	1557373	1474981	1117945
150	L-Methionine S-oxide	C02989	Sulfur metabolism	4469934	2387954	3403447	4393446	3269085	3403447	1717717	2873211	2619350	1880419	1417954	1880419	2699288	4126834	3277716	2546339	3845154	3277716	2005310	3149351	4209182	3487007	3831163	3487007
151	Cys-Gly	C01419	Sulfur metabolism	39190.1	192721	47726.7	217084	225756	192721	391586	202922	320456	290904	279426	290904	251937	217482	152411	224040	186034	217482	269704	376045	298186	352069	194846	298186
152	5-Hydroxyindoleacetate	C05635	Indole and Tryptophan	2449416	1995166	1208582	1377777	1966672	1966672	1429661	1006996	975242	24808.9	1453170	1006996	1253329	1544644	1810991	571622	1643694	1544644	1225159	2048007	1470400	1656667	1886126	1656667
153	Indoxyl	C05658	Indole and Tryptophan	78030.4	193670	937789	130020	70538.1	130020	153434	257253	190500	194748	278380	194748	138951	89590	158641	144876	99694.6	138951	689101	531418	526642	1704401	502565	531418
154	L-Adrenaline	C00788	Signaling	487097	793574	1909505	422515	899678	793574	510381	447022	586549	180272	551406	510381	1407030	718141	686177	1697155	491454	718141	456308	587082	588251	742578	519540	587082
155	Ectoine	C06231	Inositol	8409480	4826622	7789132	1131431	4124619	4826622	3154465	2136161	2872106	3203426	2354735	2872106	5472506	5229138	6633862	1488033	3347408	5229138	3400397	3197983	2779456	3418192	3365522	3365522
156	3D-(3-5/4)-Trihydroxycyclohexane-1-2-dione	C04287	Inositol	1073702	1718813	2118642	1206151	1813062	1718813	2092073	1788219	1797087	1482831	2080970	1797087	1649033	1968165	1771044	1966815	1850816	1850816	2059729	1657984	2047683	2071641	2108306	2059729
157	sn-Glycerol 3-phosphate	C00093	Glycerophospholipid biosynthesis	265186	323761	277299	376316	382815	323761	449077	514586	479572	427395	375645	449077	296121	252997	198233	802485	306247	296121	403011	413360	339007	250491	280652	339007
158	Ethanolamine phosphate	C00346	Glycerophospholipid biosynthesis	893415	446172	506188	961739	763105	763105	330414	283624	283455	338960	319441	319441	1153544	418116	887320	1970304	646207	887320	137774	536296	246726	230237	161503	230237
159	N-Methylethanolamine phosphate	C01210	Glycerophospholipid biosynthesis	48390530	57234160	56307470	15540730	30687830	48390530	49520460	54260980	45832630	37344130	31631950	45832630	35977680	41109150	39085740	38373360	37283820	38373360	42506740	29961840	40803350	49616680	45386750	42506740
160	CDP-choline	C00307	Glycerophospholipid biosynthesis	98552.3	27043.3	22418	60674.9	24344.1	27043.3	47881.8	33148.6	25769	21591.8	39438.4	33148.6	38355.3	36215.6	59416.2	61849.1	26943.8	38355.3	22102.7	64191.5	25182.9	18492.9	13265.5	22102.7
161	Acetylcholine	C01996	Glycerophospholipid biosynthesis	676163	379198	748390	1014054	1060648	748390	898597	275806	1107713	1024118	837840	898597	909594	743640	924453	1061700	840670	909594	934245	786764	1005265	926253	952234	934245
162	sn-glycero-3-Phosphoethanolamine	C01233	Glycerophospholipid biosynthesis	810738	905317	464865	1077994	516945	810738	749770	1002161	1138896	618629	841550	841550	612422	833526	582056	683241	604408	612422	1183773	569463	772427	672640	812718	772427
163	Sphingosine 1-phosphate	C06124	Sphingolipid biosynthesis	1745693	2499432	2027397	4625854	2412868	2412868	1468930	1850215	1786498	1602227	1412021	1602227	2067717	2205761	1759217	3063352	2990754	2205761	1003252	1536262	1260137	1915648	1151461	1260137
164	Sphinganine 1-phosphate	C01120	Sphingolipid biosynthesis	792810	1119586	1026258	2426517	1230696	1119586	653223	890856	843005	701056	669595	701056	1003916	1172100	929850	1586972	1751702	1172100	478580	770349	659731	856157	635325	659731
165	L-Carnitine	C00318	Carnitine and fatty acid metabolism	32168850	35456480	49408160	41046500	46701380	41046500	40668210	38530760	46526920	42919790	37087340	40668210	45261220	36322020	29264870	49075160	29330030	36322020	34157510	33488920	37456810	44233760	29321830	34157510
166	O-Propanoylcarnitine	C03017	Carnitine and fatty acid metabolism	16475140	13000900	17516190	11691510	13455230	13455230	14747870	8388623	15385120	12975060	13770660	13770660	17995110	15237180	16565540	19897830	9681194	16565540	9467363	11272820	11289200	15383800	9943041	11272820
167	O-Butanoylcarnitine	C02862	Carnitine and fatty acid metabolism	1485273	1569364	2301896	841659	1697758	1569364	1881883	1929106	1863890	1621496	1355282	1863890	2206678	1742071	1833722	2316000	999036	1833722	1595485	1228872	1728467	1901376	1449810	1595485
168	L-Octanoylcarnitine	C02838	Carnitine and fatty acid metabolism	143551	421398	478693	204155	344530	344530	377783	298371	327898	502283	354884	354884	658333	472775	583344	692585	234568	583344	482490	382310	394218	558761	383730	394218
169	O-Decanoyl-L-carnitine	C03299	Carnitine and fatty acid metabolism	138872	454519	442488	150502	363359	363359	373000	384474	333354	389188	326962	373000	440589	259354	394158	532416	185019	394158	361936	347576	341570	559322	397840	361936
170	Acetoacetate	C00164	Carnitine and fatty acid metabolism	4962658	7616058	7527682	5362664	6519402	6519402	6599376	6584242	5963870	4907068	6413650	6413650	5868932	7683844	7761940	6008842	9156743	7683844	8612001	6903020	8833433	9082531	8092998	8612001
171	Hydroxybutyrate	C03197	Carnitine and fatty acid metabolism	3456915	3588190	6212380	2044976	1787542	3456915	4941548	3639952	4376990	3547777	2167678	3639952	3787259	2836601	500	4252838	2976563	2976563	1919938	1390684	1803907	4158141	2024112	1919938
172	Citramalate	C00815	Tentative bacterial metabolites	1253076	831718	809880	1311559	1113546	1113546	1073587	981935	1164787	859903	736939	981935	1043317	802350	1293145	1106528	627377	1043317	916839	830727	924390	1002938	889858	916839
173	Indole	C00463	Tentative bacterial metabolites	698816	1138368	1241816	519671	1220226	1138368	937146	936816	871092	637919	693120	871092	1355436	930959	1158224	1775423	1239527	1239527	690802	1150172	762272	699029	736389	736389
174	Catechol	C00090	Stimulating/Exogenous compounds	8518601	5683414	7313912	5228096	6883174	6883174	6541134	5726332	5966580	6069714	5401384	5966580	8714595	5251190	6924306	4109940	5777706	5777706	5503874	6728568	5692756	4656328	4583684	5503874
175	Catecholamine	C02012	Stimulating/Exogenous compounds	116520	164811	215937	142935	155233	155233	130576	120327	81286	141174	70553.2	120327	185972	119980	169080	287826	121135	169080	109833	123231	120162	107757	107302	109833
176	Serotonin	C00780	Stimulating/Exogenous compounds	220976	310813	308025	354569	242564	308025	377458	448624	405703	342637	354896	377458	262461	358454	337753	314086	334536	334536	395886	291569	425293	389641	360632	389641
177	Catechin	C17590	Stimulating/Exogenous compounds	90326.3	161289	264774	90157.1	154485	154485	137763	72584.8	144578	92967.5	86350.3	92967.5	210749	124464	271866	239573	9567.3	210749	87735.3	97328.5	110327	155219	96981.6	97328.5
178	Taurine	C00245	Stimulating/Exogenous compounds	24339010	9798570	10087740	20113390	19176000	19176000	12143660	12636980	12140700	12667320	13387480	12636980	25081820	14909300	20409990	31816310	16633320	20409990	14325110	23569370	19061480	18135160	17222030	18135160
179	Hypotaurine	C00519	Stimulating/Exogenous compounds	377600	92699.5	253148	118102	196667	196667	197876	202986	174338	232301	251050	202986	250731	102335	133195	321201	272041	250731	475737	666393	452699	440676	507442	475737
180	Salicylate	C00805	Stimulating/Exogenous compounds	1293356	1451194	968418	359688	1541777	1293356	1339233	1190401	1172725	1335576	1330300	1330300	1704315	1267995	1727570	508367	1471685	1471685	1376805	1861093	1327127	2381358	1944343	1861093
181	Quercetin	C00389	Stimulating/Exogenous compounds	117666	87504.6	49215.1	159563	113586	113586	142900	165925	178196	182652	149938	165925	117202	88592.8	111148	112539	195275	112539	143213	160319	165745	149235	135187	149235
182	Oxyresveratrol	C10273	Stimulating/Exogenous compounds	718796	172692	186272	566203	712037	566203	361336	395983	492084	394322	474078	395983	540149	569779	615763	837645	852893	615763	290099	549690	462982	270261	458553	458553
183	Butanoic acid	C00246	Saturated Fatty acids	68447.4	62801.4	78887.7	46506.2	102386	68447.4	66037.8	83726.8	99212.6	65682.1	82803.7	82803.7	57427.3	100079	54279	45056.2	128542	57427.3	113180	94192.6	94435.9	119290	94628.2	94628.2
184	Pentanoate (valerate)	C00803	Saturated Fatty acids	5706.05	10715.4	10886.4	1406.94	8307.8	8307.8	10721.8	5066.52	5241.28	8622.84	1750.01	5241.28	4321.06	3377.54	4840.59	16346	500	4321.06	3978.34	4746.8	4627.97	1748.67	6496.64	4627.97
185	Hexanoic acid (caproate)	C01585	Saturated Fatty acids	3941.78	8122.46	12012.5	15146.9	14752.8	12012.5	16207.1	6751.57	17699.8	19004.5	23269.4	17699.8	21577.6	18508.2	12673.7	16533.5	13366.2	16533.5	22510.1	21690	20608.5	21512.9	24155.8	21690
186	Octanoic acid (caprylate)	C06423	Saturated Fatty acids	45683.5	39192.9	37335.6	59087.7	78846.8	45683.5	65250.8	66810.1	50429.7	40590.4	58080.9	58080.9	62617.5	85984.3	46099.7	45436.6	51945	51945	45621	38583	73183.3	55285.8	46130.6	46130.6
187	Tetradecanoic acid	C06424	Saturated Fatty acids	5251.44	10332.2	6154.99	11545.1	11982.3	10332.2	9911.74	14294.6	13420.3	13792.6	14342.7	13792.6	15446	10265.2	14959.3	24466.5	5153.12	14959.3	5636.56	12081.2	14134.3	8923.51	9885.25	9885.25
188	Hexadecanoic acid	C00249	Saturated Fatty acids	80819.6	88816	99509.8	90180.9	111301	90180.9	113222	92141.6	119805	117367	88686.9	113222	104631	78608.8	124555	124896	52262.4	104631	65066.8	101674	92021.7	110205	76509.8	92021.7
189	Octadecenoic acid	C00712	Monounsaturated Fatty Acids	28717	53136.8	47289.2	28428.7	40720.8	40720.8	57662.2	45131.2	59833.8	47955.8	31225.6	47955.8	45081.3	37589.4	34483	57124.5	6868.57	37589.4	32695.9	30588.5	33673.5	39354.6	32884.5	32884.5
190	Linoleate	C01595	Poly-unsaturated Fatty Acids	18095.6	26410.5	24013.8	19926.2	42838.4	24013.8	33092.5	34059.8	44040.6	36593.4	25880	34059.8	43228	23812.9	29639.6	82736.2	5571.05	29639.6	11878.4	24756.2	31203.5	41711.1	23274.7	24756.2
191	trihydroxy-octadecenoic acid	LMFA01050134	Lipids	68049.1	98890.3	66458.4	74368	90605.3	74368	91563.7	91928.7	84778.4	84515.1	81735.9	84778.4	90560.5	83469.5	76989.1	138718	60262.7	83469.5	70990.6	72755.2	92736.5	95033.8	67074.6	72755.2
192	Triacanthine	C08435	Other	275228400	331132100	348219400	248498600	256383200	275228400	333527800	304272100	505925400	347733600	283517400	333527800	341081600	269323800	312158300	382550000	244533800	312158300	245332500	241216700	301650200	396507300	286248500	286248500
193	N5-Methyl-L-glutamine	C03153	Other	349509	615494	754341	457998	508514	508514	877882	749288	701246	970491	814423	814423	656712	751917	493623	651260	606224	651260	678703	895280	1028530	892877	914515	895280
194	2-Methyleneglutarate	C02930	Other	1512078	1710053	2085788	2121745	2138203	2085788	2270929	2552955	2575752	2107690	2620970	2552955	2051208	2034490	1976179	1850058	1882063	1976179	2259619	1944042	1912586	2180121	2163326	2163326
195	Leucocyanidin	C05906	Other	168902500	382641300	364406600	332364200	404973700	364406600	445904200	456686500	438704900	458745800	501021200	456686500	483395900	464007900	376089200	415280400	416951400	416951400	496813600	499922900	511305800	552814000	432876400	499922900
196	6-Pyruvoyltetrahydropterin	C03684	Other	2010081	2360970	2029805	1153722	1520914	2010081	1845741	2154933	1836560	1640730	1645200	1836560	1260488	2267696	1467157	1261599	1863062	1467157	2218780	2046464	1640810	1638043	1739589	1739589
197	6-Lactoyl-5-6-7-8-tetrahydropterin	C04244	Other	4266.86	6582.57	25137.4	500	2191.54	4266.86	2854.35	500	2640.18	2240.03	500	2240.03	14345.3	1897.75	3666.76	18182.6	2076.41	3666.76	500	2668.1	500	9298.32	10495.1	2668.1
198	4-Aminobenzoate	C00568	Other	11076660	10618480	18568720	9397377	4323349	10618480	6538602	9983099	9686593	6934070	5981328	6934070	8936046	11286430	8704456	12040530	6730926	8936046	6607698	5040238	7357394	7485022	8825249	7357394
199	Peptide tryptophan	C02732	Other	66538220	280043700	211259100	3293837	68395440	68395440	93881960	47606670	65481560	116174000	56530230	65481560	115110600	107790700	148456100	181277900	85870000	115110600	163170300	91300020	38707260	86896780	196916600	91300020
200	Methylenediurea	C06381	Other	3487309	4413694	3924762	2339640	4862564	3924762	3270077	4387512	3406170	3341107	2930954	3341107	5484756	4436606	4105955	6610298	3501560	4436606	3410724	3822965	3441178	3679581	2966995	3441178
201	3-Oxalomalate	C01990	Other	1965223	3369419	4841398	935128	2355192	2355192	2375216	1606948	2010008	1633389	1313889	1633389	3787140	2707001	2567421	4104536	1960382	2707001	2343973	2657388	2614120	2997701	2387329	2614120
202	2-Deoxy-alpha-D-glucoside	C03573	Other	16625240	13397140	7877328	10979530	15465730	13397140	9941501	7107492	7891050	9605497	10186920	9605497	8542658	10305650	14513820	4190553	13191270	10305650	10065450	16112110	11552000	13126830	13804400	13126830
203	cis-p-Coumarate	C06738	Other	10951830	22387680	30474420	16624900	25040390	22387680	20597900	19572440	18922940	12773160	12064150	18922940	27340800	23939810	23027010	28708210	17386550	23939810	14611480	20917590	15865900	13991910	13326700	14611480
204	N-Acyl-D-mannosaminolactone	C03792	Other	396800	658054	1021766	275281	649474	649474	472588	590841	576460	401793	482982	482982	709232	672466	605134	788305	452694	672466	428969	436290	458621	447183	414238	436290
205	N6-Methyl-L-lysine	C02728	Other	689810	1055174	642310	681528	214980	681528	387454	451747	585318	437386	542557	451747	375649	434823	305740	418309	273882	375649	346875	414243	367088	367093	389170	367093
206	Muramic acid	C06470	Other	864861	577163	393249	1626663	1334267	864861	1861576	1848794	1883059	1395226	2042445	1861576	1075413	2050059	1179183	971250	1894952	1179183	1714396	1837814	2032917	1621116	1379232	1714396
207	Dethiobiotin	C01909	Other	351983	425535	705085	364797	344099	364797	793886	560847	750256	537923	511616	560847	784848	703611	498369	2048130	390968	703611	531723	539731	375881	423326	465426	465426
208	L-2-Aminoadipate	C00956	Other	19347130	29894740	20886380	32995470	28446980	28446980	59131720	60443470	44825120	48983580	41301030	48983580	30141230	38296190	27784940	28412450	34827010	30141230	29729310	33135140	35877640	34513440	33353610	33353610
209	Threonate	C01620	Other	398364	298481	412002	500	671508	398364	1454379	1882501	500	464699	500	464699	1120834	600753	934721	2672698	725921	934721	1503170	1268423	723694	687741	692232	723694
210	Tripeptide	C00316	Other	1251494	1123543	556524	82486.2	610564	610564	443478	336810	281909	317131	281541	317131	364635	201879	397678	68577.7	204876	204876	209911	291018	196364	332511	257219	257219
211	Maleamate	C01596	Other	890882	1062860	1641281	2063790	1803364	1641281	651662	588198	650038	532861	1195614	650038	2721490	2006384	1385442	2502288	1076274	2006384	823249	829811	805466	1263715	779564	823249
212	S-Ribosyl-L-homocysteine	C03539	Other	86333.4	1154225	591912	20477.9	299925	299925	482010	333765	279290	540099	289337	333765	393984	553116	378961	590840	403920	403920	665872	469211	67138.6	432119	805721	469211
213	Ergothioneine	C05570	Other	6956262	26274310	20267220	500	7132562	7132562	9489175	5125366	6791732	11366540	5778898	6791732	12154120	10954810	14786070	18710890	8041878	12154120	16025840	9685108	4541636	8918155	19052840	9685108
214	Sodium glucuronate	C13085	Other	44569.8	95881.6	85429.6	48876.1	44223.4	48876.1	68310.3	45215.9	65771.1	30759.8	45974.8	45974.8	81330.8	64776.7	64297.9	79628.1	54922.8	64776.7	46097.1	47685.3	58474.6	78856.9	51546.4	51546.4
215	N-Acetyl-leucyl-leucine	C11333	Other	153688	108398	634086	257922	500	153688	36263.1	109014	99110.8	107078	20311.1	99110.8	231676	178928	122978	239419	78653.3	178928	26162	500	38543.4	53642.4	137022	38543.4
216	S-formylglutathione	C01031	Other	169310	198266	94428	165494	193183	169310	172325	188788	172024	69540.2	113429	172024	232076	164700	136521	232499	156139	164700	129573	176683	137132	117706	104866	129573
217	Diallyl sulfide	C08370	Other	150839	103401	74518.7	44515.8	101948	101948	92311	97449.7	83792.5	96624.6	84823.3	92311	85614.7	99781.3	125197	36190.2	82052.6	85614.7	81671.2	113283	65102.4	193792	127671	113283
218	Shikimate 3-phosphate	C03175	Other	384024	205982	43866.8	532312	214934	214934	529635	529502	538806	368173	441610	529502	83536.9	285116	247963	83718.6	318035	247963	350990	253771	344282	237439	380433	344282
219	D-glucono-1,5-lactone	C00198	Other	49974.1	88885.7	70121.9	59425.6	94309.4	70121.9	111671	84137.5	113154	64039.4	80699.8	84137.5	206958	164099	172938	227512	120809	172938	101882	126343	132235	146767	129448	129448
220	Poly-gamma-D-glutamate	C05723	Other	99663610	68671610	71607110	106927700	125820600	99663610	134326400	118422600	148415700	141988500	165917300	141988500	113152300	122802300	107546700	125009200	122416200	122416200	171829100	169078900	177992500	156293500	179276600	171829100
221	Dihydroflavonol	C15570	Other	105691	104458	75792.8	102740	160456	104458	180381	167444	146658	119110	128952	146658	87366.8	111477	124288	47422.3	157488	111477	128772	103315	141602	110606	100542	110606
222	Carnosine	C00386	Other	4227926	6099014	3985505	3078568	4517460	4227926	4918395	4001722	4946486	4246606	4422438	4422438	4003020	4530358	4403027	4269732	4734518	4403027	4225590	4587984	4546922	5048978	5122354	4587984
