# Supplementary material for: Erythrocyte adenosine A2B receptor prevents cognitive and auditory dysfunction by promoting hypoxic and metabolic reprogramming
Source: PLoS Biol. 2021 Jun 17;19(6):e3001239. doi: 10.1371/journal.pbio.3001239 (PMC8211187; doi:10.1371/journal.pbio.3001239)
Supplement: S1 Table — List of 222 metabolites has been identified through metabolic screening in the erythrocytes of eAdora2b−/− and control mice with or without hypoxia treatment. Median values of each metabolite were calculated from each group. n = 5 for each group. Numerical data underlying table are provided in S1 Data. ADORA2B, adenosine A2B receptor. (XLSX) [file pbio.3001239.s005.xlsx]

## Sheet: Sheet1
No.	Pathway	compound	CmpdID	Median
				control		eA2B-/-
				Normoxia	Hypoxia	Normoxia	Hypoxia
1	Amino acids	alanine	C00041	92910750	127792400	106955000	167234900
2	Amino acids	arginine	C00062	22706710	19733750	16010310	22050280
3	Amino acids	asparagine	C00152	6653416	7134550	8163610	7145602
4	Amino acids	aspartate	C00049	9480460	21340020	13345160	24037750
5	Amino acids	cysteine	C00097	4926.07	4109.23	14602.9	5092.28
6	Amino acids	glutamate	C00025	94111000	38186310	109932600	76235110
7	Amino acids	glutamine	C00064	185814600	145827200	244932400	166160100
8	Amino acids	glycine	C00037	27981160	32547190	30906330	30942670
9	Amino acids	histidine	C00135	6684266	6691560	5703672	7020768
10	Amino acids	leucine/isoleucine	C00123	228255700	331500300	181834000	308363600
11	Amino acids	lysine	C00047	21169370	10107020	6540826	8004532
12	Amino acids	methionine	C00073	61946550	91272740	61920880	102650300
13	Amino acids	phenylalanine	C00079	56641730	74746790	49760430	80886110
14	Amino acids	proline	C00148	121272500	172368700	136012700	198486700
15	Amino acids	serine	C00065	22868000	21422290	20468730	21244950
16	Amino acids	threonine	C00188	31968380	51713870	37962640	60897530
17	Amino acids	tryptophan	C00078	6566482	6044320	5952190	7110704
18	Amino acids	tyrosine	C00082	93317470	109066300	69787450	111150900
19	Amino acids	valine	C00183	271851500	281475600	242829100	313172100
20	Amino acids	kynurenine	C00328	880645	726597	424708	829739
21	Nucleotides	ATP	C00002	3329194	6767260	4526876	6333268
22	Nucleotides	ADP	C00008	13079760	7651550	13117650	14928890
23	Nucleotides	AMP	C00020	3433342	2282782	4125165	4921024
24	Nucleotides	Hypoxanthine	C00262	8302562	1967000	3464425	4557562
25	Nucleotides	Xanthine	C00385	180565	53880.1	118561	184231
26	Nucleotides	Guanine	C00242	2863054	4243040	2956364	4641778
27	Nucleotides	Allantoate	C00499	32042.3	72811.4	54378.8	103221
28	Nucleotides	(S)(+)-Allantoin	C02350	1084640	456212	927244	561804
29	Nucleotides	5-Hydroxyisourate	C11821	20815300	16055140	24681520	25377810
30	Nucleotides	5--Phosphoribosyl-N-formylglycinamide	C04376	153746	497001	259267	1036482
31	Nucleotides	UTP	C00075	876923	282630	967844	911414
32	Nucleotides	UMP	C00105	3929.12	6019.51	2301.26	2988.21
33	Nucleotides	GMP	C00144	185297	79924.6	194648	111117
34	Nucleotides	IMP	C00130	144583	79761.6	43021.2	89204.2
35	Nucleotides	CMP	C00055	27325.4	41275	30065.3	46646.5
36	Nucleotides	Cytidine	C00475	678130	492759	364661	295254
37	Nucleotides	2--3--Cyclic CMP	C02354	17928	50614.3	9449.17	27806.8
38	Nucleotides	5-6-Dihydrothymine	C00906	5112762	6151934	5092222	3701605
39	Nucleotides	Thymine	C00178	115898	92775.9	178932	153256
40	Nucleotides	Thymidine	C00214	60938	71247.7	120356	110440
41	Nucleotides	3--5--Cyclic IMP	C00943	71878.9	304692	166528	343766
42	Nucleotides	Pyridoxal	C00250	401992	217749	269629	210355
43	Nucleotides	4-Pyridoxate	C00847	4197572	2559239	3198979	2928673
44	Nucleotides	Pyridoxamine phosphate	C00647	500	500	500	500
45	Nucleotides	Nicotinamide	C00153	16462590	46381010	15897050	68708130
46	Nucleotides	Adenine	C00147	5766728	3535167	4887496	3895221
47	Nucleotides	Adenosine	C00212	391170	598110	378797	651463
48	Nucleotides	Guanosine	C00387	310917	272924	314306	333988
49	Nucleotides	Inosine	C00294	4450156	3377750	3965065	2748850
50	Nucleotides	NAD+	C00003	11519570	7273932	9322074	5738184
51	Nucleotides	Purine	C15587	369053	380486	402696	424429
52	Nucleotides	Flavin	C00176	1592588	2186872	1385258	1474592
53	Nucleotides	Nicotinate ribonucleotide	C01185	11215	881337	16389.5	1233598
54	Nucleotides	N6-(1-2-Dicarboxyethyl)-AMP	C03794	69518.5	106852	44959	64118.3
55	Nucleotides	3--5--Cyclic AMP	C00575	374486	470391	539074	649056
56	Nucleotides	5-Phosphoribosylamine	C03090	15686.1	73353.5	40287.2	89250.3
57	Phosphates	Orthophosphate	C00009	48951090	61920960	69548780	73042180
58	Phosphates	Diphosphate	C00013	2036172	3417211	3692671	4200104
59	Phosphates	Triphosphate	C00536	74148.4	80218.3	78281.3	93987.6
60	Glycolysis	D-Glucose	C00031	75288940	74107620	85689850	76848950
61	Glycolysis	D-Glucose 6-phosphate	C02965	11883110	3606055	9284063	4229308
62	Glycolysis	D-Fructose 1-6-bisphosphate	C00354	4487756	1276426	1346354	1789529
63	Glycolysis	D-Glyceraldehyde 3-phosphate	C00118	3651225	1788282	3094500	2646488
64	Glycolysis	2-3-Bisphosphoglycerate	C03339	243000000	388000000	205000000	185000000
65	Glycolysis	2/3-Phospho-D-glycerate	C00631	52097940	40097320	41223900	43621850
66	Glycolysis	Phosphoenolpyruvate	C00074	2805304	1950339	1755099	1281435
67	Glycolysis	Pyruvate	C00022	3954123	4226424	4434142	4024492
68	Glycolysis	Lactate	C01432	115996700	169889000	90804870	216115700
69	Other sugars	Maltose	C00208	218328	370690	258432	343779
70	Other sugars	Mannitol	C00392	779954	1049514	732336	1134140
71	Other sugars	D-Sorbitol	C00794	774088	1055563	738189	1027213
72	Other sugars	D-Ribose	C00121	1853268	2667918	2033682	2653131
73	Other sugars	D-Rhamnose	C01684	727821	781553	509404	784586
74	Other sugars	D-Arabitol	C01904	74761.7	114542	114027	89792.9
75	Carboxylic acid	Citrate	C00158	1461560	1994143	2250075	4403600
76	Carboxylic acid	2-Oxoglutarate	C00026	64479.8	39081.4	77299.4	81586.3
77	Carboxylic acid	Succinate	C00042	991083	834563	1429398	971107
78	Carboxylic acid	Fumarate	C00122	505686	921865	681165	1236713
79	Carboxylic acid	Malate	C00149	10307840	9295847	12790720	15303650
80	Carboxylic acid	Oxaloacetate	C00036	528996	482776	544279	542832
81	Carboxylic acid	5-Aminolevulinate	C00430	833781	883993	1008384	895645
82	Carboxylic acid	2-Hydroxyglutarate/Citramalate	C02630	2319896	2605171	2241510	2687508
83	Pentose Phosphate Pathway	6-Phospho-D-gluconate	C00345	1075392	726933	981217	682288
84	Pentose Phosphate Pathway	D-Glucono-1-5-lactone 6-phosphate	C01236	763408	343642	498259	330006
85	Pentose Phosphate Pathway	D-Erythrose 4-phosphate	C00279	279678	163723	238036	149028
86	Pentose Phosphate Pathway	Sedoheptulose 1-phosphate	C06222	6764466	5539892	4921356	5767752
87	Pentose Phosphate Pathway	alpha-D-Ribose 1-phosphate	C00620	6915744	4111504	6387902	7310244
88	GSH homeostasis	Glutathione	C00051	1232566	101365	3188551	500
89	GSH homeostasis	Glutathione disulfide	C00127	128771500	100863000	161546900	143873000
90	GSH homeostasis	5-Oxoproline	C01879	141988500	99663610	171829100	122416200
91	GSH homeostasis	S-Glutathionyl-L-cysteine	C05526	3808824	4651156	3604079	6532138
92	GSH homeostasis	Ascorbate	C00072	1638390	1575600	1986260	1603475
93	GSH homeostasis	Dehydroascorbate	C05422	492389	604768	419222	617992
94	Gamma-glutamyls	gamma-L-Glutamyl-L-cysteine	C00669	3332.59	11315.1	5643.81	6383.89
95	Gamma-glutamyls	gamma-Glutamyl-Se-methylselenocysteine	C05695	261357	331332	220896	322171
96	Gamma-glutamyls	gamma-L-Glutamyl-D-alanine	C03738	747584	729163	804637	1196109
97	Gamma-glutamyls	gamma-Glutamyl-gamma-aminobutyrate	C15767	158126	136359	287949	269534
98	Gamma-glutamyls	(5-L-Glutamyl)-L-glutamine	C05283	6739390	3793909	6041484	4528934
99	Gamma-glutamyls	5-L-Glutamyl-taurine	C05844	433001	828499	964344	866355
100	Gamma-glutamyls	gamma-L-Glutamyl-[acp]	C18006	355420	477204	463301	315014
101	Serine biosynthesis and one-carbon metabolism	L-Homocysteine	C00155	402946	167404	236829	52042.4
102	Serine biosynthesis and one-carbon metabolism	L-Homoserine	C00263	35981040	50961010	37731920	58712430
103	Serine biosynthesis and one-carbon metabolism	N-N-Dimethylglycine	C01026	7120842	6367044	5476166	6683052
104	Serine biosynthesis and one-carbon metabolism	D-O-Phosphoserine	C02532	1155485	980891	1512248	1395876
105	Serine biosynthesis and one-carbon metabolism	S-Adenosyl-L-homocysteine	C00021	388726	609552	452195	744073
106	Serine biosynthesis and one-carbon metabolism	S-Adenosyl-L-methionine	C00019	1164975	1266003	1294848	1912870
107	Serine biosynthesis and one-carbon metabolism	Sarcosine	C00213	92910750	127792400	106955000	167234900
108	Folate pool (One carbon metabolism)	5-10-Methenyltetrahydrofolate	C00445	4028492	9207239	5562274	12061750
109	urea cycle and polyamines	Ornithine	C01602	504657	874498	630222	746715
110	urea cycle and polyamines	L-Citrulline	C00327	41402230	25160830	39751520	32587400
111	urea cycle and polyamines	N-(L-Arginino)succinate	C03406	503736	251086	387152	388356
112	urea cycle and polyamines	Urate	C00366	203806	310115	298096	417830
113	urea cycle and polyamines	Putrescine	C00134	144600	272594	158840	394481
114	urea cycle and polyamines	Spermidine	C00315	23725670	45594220	26089670	68614420
115	urea cycle and polyamines	Spermine	C00750	183921	214648	112589	176904
116	urea cycle and polyamines	Atherospermidine	C09347	96912.8	105764	106826	185118
117	Aminosugars	N-Acetylneuraminate	C00270	2306563	2168880	2285718	2472862
118	Aminosugars	N-Glycoloyl-neuraminate	C03410	151027	217286	207511	210389
119	Aminosugars	alpha-D-Glucosamine 1-phosphate	C06156	272398	192465	237696	183251
120	Aminosugars	D-Glucosamine	C00329	692146	424847	515446	282074
121	Aminosugars	L-Arabinose	C00259	1747420	2083062	2021213	2055140
122	Aminosugars	1-4-beta-D-Xylan	C02352	2188158	2339994	2514348	2365536
123	Aminosugars	Glycolate	C00160	40131310	40346370	43281390	39922510
124	Aminosugars	beta-L-arabinose 1-phosphate	C03906	569312	511491	586091	712739
125	Aminosugars	UDP-N-acetyl-D-glucosamine	C00043	1007718	677298	597728	763711
126	Aminosugars	CMP-N-acetylneuraminate	C00128	12646010	9709256	15523800	14607310
127	Arginine and proline metabolism	gamma-L-Glutamylputrescine	C15699	48714.8	44209.8	43493.2	47513.4
128	Arginine and proline metabolism	5-Guanidino-2-oxopentanoate	C03771	612106	545782	619640	604438
129	Arginine and proline metabolism	Phosphocreatine	C02305	10783.2	54543.9	55111.1	225220
130	Arginine and proline metabolism	Creatine	C00300	314196900	347140900	318238500	405351300
131	Arginine and proline metabolism	Creatinine	C00791	11517810	9517410	9889853	11457040
132	Arginine and proline metabolism	4-Acetamidobutanoate	C02946	503621	630542	574211	714811
133	Arginine and proline metabolism	N-Acetylornithine	C00437	6873390	5975086	8222736	10526240
134	Arginine and proline metabolism	N-Succinyl-L-glutamate	C05931	86351.5	101851	77809.6	104920
135	Arginine and proline metabolism	N-Succinyl-L-glutamate 5-semialdehyde	C05932	72781.5	95959.7	115812	121615
136	Arginine and proline metabolism	L-1-Pyrroline-3-hydroxy-5-carboxylate	C04281	142691300	103028100	173908400	115187900
137	Arginine and proline metabolism	Asymmetric dimethylarginine	C03626	900426	646185	672796	688649
138	Arginine and proline metabolism	Aminofructose 6-phosphate	C12214	676523	925984	745442	981071
139	Arginine and proline metabolism	N-Succinyl-L-citrulline	C18048	3380508	2571037	3423353	2808032
140	Arginine and proline metabolism	Guanidinoacetate	C00581	4120450	2395620	2386846	1864580
141	Arginine and proline metabolism	trans-4-Hydroxy-L-proline	C01157	10393230	9355371	14110560	10225340
142	Panthothenate metabolism	Pantothenol	C00864	156922	183505	63316.2	286663
143	Panthothenate metabolism	Uracil	C00106	169956	111110	204621	170078
144	Panthothenate metabolism	5-6-Dihydrouracil	C00429	821258	855713	665780	743047
145	Panthothenate metabolism	Pantetheine	C00831	26791.7	41692.3	12591	56002.2
146	Panthothenate metabolism	Pantetheine 4--phosphate	C01134	447010	407687	561455	487260
147	Panthothenate metabolism	D-4--Phosphopantothenate	C03492	31301.8	20381.6	32043.5	24381.1
148	Sulfur metabolism	L-Selenomethionine	C05335	42040.9	47514.2	48824.6	59046.6
149	Sulfur metabolism	(R)-S-Lactoylglutathione	C03451	1070873	1191531	1117945	1263239
150	Sulfur metabolism	L-Methionine S-oxide	C02989	1880419	3403447	3487007	3277716
151	Sulfur metabolism	Cys-Gly	C01419	290904	192721	298186	217482
152	Indole and Tryptophan	5-Hydroxyindoleacetate	C05635	1006996	1966672	1656667	1544644
153	Indole and Tryptophan	Indoxyl	C05658	194748	130020	531418	138951
154	Signaling	L-Adrenaline	C00788	510381	793574	587082	718141
155	Inositol	Ectoine	C06231	2872106	4826622	3365522	5229138
156	Inositol	3D-(3-5/4)-Trihydroxycyclohexane-1-2-dione	C04287	1797087	1718813	2059729	1850816
157	Glycerophospholipid biosynthesis	sn-Glycerol 3-phosphate	C00093	449077	323761	339007	296121
158	Glycerophospholipid biosynthesis	Ethanolamine phosphate	C00346	319441	763105	230237	887320
159	Glycerophospholipid biosynthesis	N-Methylethanolamine phosphate	C01210	45832630	48390530	42506740	38373360
160	Glycerophospholipid biosynthesis	CDP-choline	C00307	33148.6	27043.3	22102.7	38355.3
161	Glycerophospholipid biosynthesis	Acetylcholine	C01996	898597	748390	934245	909594
162	Glycerophospholipid biosynthesis	sn-glycero-3-Phosphoethanolamine	C01233	841550	810738	772427	612422
163	Sphingolipid biosynthesis	Sphingosine 1-phosphate	C06124	1602227	2412868	1260137	2205761
164	Sphingolipid biosynthesis	Sphinganine 1-phosphate	C01120	701056	1119586	659731	1172100
165	Carnitine and fatty acid metabolism	L-Carnitine	C00318	40668210	41046500	34157510	36322020
166	Carnitine and fatty acid metabolism	O-Propanoylcarnitine	C03017	13770660	13455230	11272820	16565540
167	Carnitine and fatty acid metabolism	O-Butanoylcarnitine	C02862	1863890	1569364	1595485	1833722
168	Carnitine and fatty acid metabolism	L-Octanoylcarnitine	C02838	354884	344530	394218	583344
169	Carnitine and fatty acid metabolism	O-Decanoyl-L-carnitine	C03299	373000	363359	361936	394158
170	Carnitine and fatty acid metabolism	Acetoacetate	C00164	6413650	6519402	8612001	7683844
171	Carnitine and fatty acid metabolism	Hydroxybutyrate	C03197	3639952	3456915	1919938	2976563
172	Tentative bacterial metabolites	Citramalate	C00815	981935	1113546	916839	1043317
173	Tentative bacterial metabolites	Indole	C00463	871092	1138368	736389	1239527
174	Stimulating/Exogenous compounds	Catechol	C00090	5966580	6883174	5503874	5777706
175	Stimulating/Exogenous compounds	Catecholamine	C02012	120327	155233	109833	169080
176	Stimulating/Exogenous compounds	Serotonin	C00780	377458	308025	389641	334536
177	Stimulating/Exogenous compounds	Catechin	C17590	92967.5	154485	97328.5	210749
178	Stimulating/Exogenous compounds	Taurine	C00245	12636980	19176000	18135160	20409990
179	Stimulating/Exogenous compounds	Hypotaurine	C00519	202986	196667	475737	250731
180	Stimulating/Exogenous compounds	Salicylate	C00805	1330300	1293356	1861093	1471685
181	Stimulating/Exogenous compounds	Quercetin	C00389	165925	113586	149235	112539
182	Stimulating/Exogenous compounds	Oxyresveratrol	C10273	395983	566203	458553	615763
183	Saturated Fatty acids	Butanoic acid	C00246	82803.7	68447.4	94628.2	57427.3
184	Saturated Fatty acids	Pentanoate (valerate)	C00803	5241.28	8307.8	4627.97	4321.06
185	Saturated Fatty acids	Hexanoic acid (caproate)	C01585	17699.8	12012.5	21690	16533.5
186	Saturated Fatty acids	Octanoic acid (caprylate)	C06423	58080.9	45683.5	46130.6	51945
187	Saturated Fatty acids	Tetradecanoic acid	C06424	13792.6	10332.2	9885.25	14959.3
188	Saturated Fatty acids	Hexadecanoic acid	C00249	113222	90180.9	92021.7	104631
189	Monounsaturated Fatty Acids	Octadecenoic acid	C00712	47955.8	40720.8	32884.5	37589.4
190	Poly-unsaturated Fatty Acids	Linoleate	C01595	34059.8	24013.8	24756.2	29639.6
191	Lipids	trihydroxy-octadecenoic acid	LMFA01050134	84778.4	74368	72755.2	83469.5
192	Other	Triacanthine	C08435	333527800	275228400	286248500	312158300
193	Other	N5-Methyl-L-glutamine	C03153	814423	508514	895280	651260
194	Other	2-Methyleneglutarate	C02930	2552955	2085788	2163326	1976179
195	Other	Leucocyanidin	C05906	456686500	364406600	499922900	416951400
196	Other	6-Pyruvoyltetrahydropterin	C03684	1836560	2010081	1739589	1467157
197	Other	6-Lactoyl-5-6-7-8-tetrahydropterin	C04244	2240.03	4266.86	2668.1	3666.76
198	Other	4-Aminobenzoate	C00568	6934070	10618480	7357394	8936046
199	Other	Peptide tryptophan	C02732	65481560	68395440	91300020	115110600
200	Other	Methylenediurea	C06381	3341107	3924762	3441178	4436606
201	Other	3-Oxalomalate	C01990	1633389	2355192	2614120	2707001
202	Other	2-Deoxy-alpha-D-glucoside	C03573	9605497	13397140	13126830	10305650
203	Other	cis-p-Coumarate	C06738	18922940	22387680	14611480	23939810
204	Other	N-Acyl-D-mannosaminolactone	C03792	482982	649474	436290	672466
205	Other	N6-Methyl-L-lysine	C02728	451747	681528	367093	375649
206	Other	Muramic acid	C06470	1861576	864861	1714396	1179183
207	Other	Dethiobiotin	C01909	560847	364797	465426	703611
208	Other	L-2-Aminoadipate	C00956	48983580	28446980	33353610	30141230
209	Other	Threonate	C01620	464699	398364	723694	934721
210	Other	Tripeptide	C00316	317131	610564	257219	204876
211	Other	Maleamate	C01596	650038	1641281	823249	2006384
212	Other	S-Ribosyl-L-homocysteine	C03539	333765	299925	469211	403920
213	Other	Ergothioneine	C05570	6791732	7132562	9685108	12154120
214	Other	Sodium glucuronate	C13085	45974.8	48876.1	51546.4	64776.7
215	Other	N-Acetyl-leucyl-leucine	C11333	99110.8	153688	38543.4	178928
216	Other	S-formylglutathione	C01031	172024	169310	129573	164700
217	Other	Diallyl sulfide	C08370	92311	101948	113283	85614.7
218	Other	Shikimate 3-phosphate	C03175	529502	214934	344282	247963
219	Other	D-glucono-1,5-lactone	C00198	84137.5	70121.9	129448	172938
220	Other	Poly-gamma-D-glutamate	C05723	141988500	99663610	171829100	122416200
221	Other	Dihydroflavonol	C15570	146658	104458	110606	111477
222	Other	Carnosine	C00386	4422438	4227926	4587984	4403027
